# Supplementary material for: Effects of food policy actions on Indigenous Peoples’ nutrition-related outcomes: a systematic review
Source: PubMed Central journal article supplement — BMJ Glob Health. 2020 Aug 18;5(8):e002442. doi: 10.1136/bmjgh-2020-002442 (PMC7437701; doi:10.1136/bmjgh-2020-002442), 2020-08-18
Supplement: bmjgh-2020-002442supp001.pdf [file bmjgh-2020-002442supp001.pdf]

## Supplementary File 1: Medline Search Terms

| # | Search terms and MeSH                                                                                                                                                                                                                                                                                                                                                                                                                                                                                                                                                                                                                                                                                                                                                                                                                                                                                                                                                                                                                                                                                                                                                                                                                                                                                                                                                                                                                                                                                                                                                                                                                                                                                                                                                                                                                   |
|---|-----------------------------------------------------------------------------------------------------------------------------------------------------------------------------------------------------------------------------------------------------------------------------------------------------------------------------------------------------------------------------------------------------------------------------------------------------------------------------------------------------------------------------------------------------------------------------------------------------------------------------------------------------------------------------------------------------------------------------------------------------------------------------------------------------------------------------------------------------------------------------------------------------------------------------------------------------------------------------------------------------------------------------------------------------------------------------------------------------------------------------------------------------------------------------------------------------------------------------------------------------------------------------------------------------------------------------------------------------------------------------------------------------------------------------------------------------------------------------------------------------------------------------------------------------------------------------------------------------------------------------------------------------------------------------------------------------------------------------------------------------------------------------------------------------------------------------------------|
| 1 | Indigen*OR Aborigin* OR "Torres Strait Island*" OR "First People*" OR Maori* OR "First Nation*" OR Inuit* OR Metis OR American Indian* OR Amerindian* OR Eskimo* OR "Native American*" OR "Native Canadian*" OR Native Hawaiian* OR "Native people*" OR "Native population*" OR Tribal OR Tribe* OR (Native* N2 Alaska*) OR "North American Native" OR (Native* N2 Siberia*) OR Saami OR Sami OR Greenlandic* OR Nunavut* OR (Indian* NOT (India or India's or India/)) OR ((Remote OR Isolated OR Northern) N3 Communit*) OR ("New Zealand" AND ethnic*)                                                                                                                                                                                                                                                                                                                                                                                                                                                                                                                                                                                                                                                                                                                                                                                                                                                                                                                                                                                                                                                                                                                                                                                                                                                                               |
| 2 | American native continental ancestry group/ OR Oceanic Ancestry Group/ OR United States Indian Health Service/ OR Health Services OR Indigenous/                                                                                                                                                                                                                                                                                                                                                                                                                                                                                                                                                                                                                                                                                                                                                                                                                                                                                                                                                                                                                                                                                                                                                                                                                                                                                                                                                                                                                                                                                                                                                                                                                                                                                        |
| 3 | 1 OR 2                                                                                                                                                                                                                                                                                                                                                                                                                                                                                                                                                                                                                                                                                                                                                                                                                                                                                                                                                                                                                                                                                                                                                                                                                                                                                                                                                                                                                                                                                                                                                                                                                                                                                                                                                                                                                                  |
| 4 | "food environment*" OR "nutrition environment*" OR "obesogenic environment*" OR ((built OR social OR physical OR cultural OR urban OR neighbo#rhood* OR school* OR communit* OR work*) N2 environment*) OR (health* N2 environment*) OR "environment* design*" OR "urban design*" OR "planning polic*" OR "urban planning" OR "city planning" OR "environment* intervention*" OR ((population* OR societ* OR upstream OR "community based") N3 (intervention* OR action* OR initiative* OR program* OR strateg* OR prevention OR policy OR policies)) OR ((Policy or policies) N2 (social OR public* OR urban OR environment* OR intervention*)) OR zoning OR (Cost* N4 (food* OR beverage* OR "soft drink*" OR "energy drink*" OR "sugar* drink*" OR fruit* OR vegetable*)) OR (Price* N4 (food* OR beverage* OR "soft drink*" OR "energy drink*" OR "sugar* drink*" OR fruit* OR vegetable*)) OR pricing* OR subsid* OR discount* OR voucher* OR coupon* OR rebate* OR refund* OR reimburs* OR tax* OR tariff* OR ((demand* or price*) N2 elastic*) OR "transfer program*" OR "income support" OR "income management" OR "cash transfer" OR ((economic OR financial OR fiscal OR monetary OR pecuniary) N2 (strateg*OR intervention* OR policy OR policies OR incentive* OR regulat* OR law* OR legislat* OR penalt* OR tool* OR reward*)) OR advert* OR marketed OR marketer OR marketing OR branding OR commercial* OR "persuasive communication*" OR "persuasi* technique*" OR sponsor* OR "product placement" OR advergam* OR "pric* promot*" OR "store promot*" OR "sale* promot*" OR "special offer*" OR (food* N2 promotion*) OR (beverage* N2 promotion*) OR ((Provision OR provide OR offer* OR availab*) N3 (food* OR beverage* OR "soft drink*" OR "energy drink*" OR "sugar* drink*" OR water* OR fruit* OR vegetable* OR |

|   |                                                                                                                                                                                                                                                                                                                                                                                                                                                                                                                                                                                                                                                                                                                                                                                                                                                                                                                                                                                                                                                                                                                                                                                                                                                                                                                                                                                                                                                                                                                                                                                                                                                                                                                                                                                                                                                                                                                                                                                                                                                                                                                                                                                                                                                                                                                                                                                                                                                                                                                                                                                                                                                                                                                                                                                                                                                                                                                                                                                                                                                                                                                                                                                                                                                                        |
|---|------------------------------------------------------------------------------------------------------------------------------------------------------------------------------------------------------------------------------------------------------------------------------------------------------------------------------------------------------------------------------------------------------------------------------------------------------------------------------------------------------------------------------------------------------------------------------------------------------------------------------------------------------------------------------------------------------------------------------------------------------------------------------------------------------------------------------------------------------------------------------------------------------------------------------------------------------------------------------------------------------------------------------------------------------------------------------------------------------------------------------------------------------------------------------------------------------------------------------------------------------------------------------------------------------------------------------------------------------------------------------------------------------------------------------------------------------------------------------------------------------------------------------------------------------------------------------------------------------------------------------------------------------------------------------------------------------------------------------------------------------------------------------------------------------------------------------------------------------------------------------------------------------------------------------------------------------------------------------------------------------------------------------------------------------------------------------------------------------------------------------------------------------------------------------------------------------------------------------------------------------------------------------------------------------------------------------------------------------------------------------------------------------------------------------------------------------------------------------------------------------------------------------------------------------------------------------------------------------------------------------------------------------------------------------------------------------------------------------------------------------------------------------------------------------------------------------------------------------------------------------------------------------------------------------------------------------------------------------------------------------------------------------------------------------------------------------------------------------------------------------------------------------------------------------------------------------------------------------------------------------------------------|
|   | <p>meal* OR snack*) OR WIC OR "Special Supplemental Nutrition Program for Women, Infants and Children" OR "food stamp*" OR "preschool meal*" OR "school meal*" OR "school lunch*" OR "meal* program*" OR "menu plan*" OR canteen* OR "tuck shop*" OR "cafeteria" OR catering OR ((nutrition* OR food*) N2 (standard* or guideline* or policy or policies)) OR "school* food*" OR "food service*" OR "breakfast program*" OR "lunch program*" OR "snack program*" OR "vending machine*" OR "procurement" OR ((work* OR school* OR preschool OR childcare OR organization OR sport* OR "health facilit*" OR "health service*" OR hospital*) N4 (policy OR policies OR setting* OR intervention* OR guideline* OR regulat* OR legislat* OR law* OR standard* OR restrict*)) OR "Supplemental Nutrition Assistance Program*" OR "food bank*" OR (food N3 composition) OR "nutri* composition" OR reformulat* OR fortifi* OR ("trans fat*" N5 "polic* OR legislat* OR ban* OR interven* OR label* OR law* OR standard* OR restrict* OR regulat* OR eliminat*)) OR ((adjust* OR alter* OR ban* OR chang* OR control* OR decreas* OR limit* OR modif* OR reduc* OR standard* OR restrict* OR regulat* OR legislat* OR eliminat* OR improv*) N5 (recipe* OR food* OR beverage* OR "soft drink*" OR "energy drink*" OR "sugar* drink*" OR product* OR formula* OR ingredient* OR "portion size*)) OR ((food* OR nutri* OR calorie* OR kilojoule* OR menu* OR shelf OR warning OR "point of purchase" OR interpretive) N2 (label* OR logo* OR symbol* OR icon* OR tag*)) OR "front of pack*" OR "back of pack*" OR "plain packag*" OR "nutrition information panel*" OR "nutrition facts" OR ("nutrition information" N5 package) OR "health logo" OR ("traffic light*" AND label*) OR "guiding stars" OR "Canada's Health Check" OR "AHA Heart Check" OR NuVal OR OR "Guideline Daily Amount" OR "Percentage Daily Intake" OR "Pick the Tick" OR "health star rating*" OR "health claim*" OR (Nutri* N2 claim*) OR "food system*" OR "supply chain*" OR ((import OR export) AND (food* OR beverage* OR "soft drink*" OR "energy drink*" OR "sugar* drink*" OR sugar* OR fruit* OR vegetable*)) OR retail* OR "food store*" OR supermarket* OR ((food* OR fruit* OR vegetable*) N3 market*) OR "grocery store*" OR "community store*" OR "food production" OR "food processing" OR agricultur* OR freight* OR (transport* N3 (food* OR beverage* OR "soft drink*" OR "sugar* drink*" OR fruit* OR vegetable*)) OR trade OR OR (liberali* N2 market*) OR "legislat* OR "regulat* polic*" OR vendor* OR "green cart*" OR "food supply" OR "food supplier*" OR (food* N3 (governance or acquisition)) OR "food sovereignty" OR "traditional food*" OR "bush food*" OR "native food*" OR "nutrition promotion" OR "nutrition information" OR "nutrition education" OR "nutrition training" OR "nutrition course*" OR curricul* OR "nutrition* advice" OR "diet* advice" OR "nutrition* counsel#" OR coaching OR "skill* development" OR "food skill*" OR "food literacy" OR cooking OR "public* awareness" OR campaign* OR "mass communication*" OR "mass media" OR "social marketing" OR "social media" OR "public* awareness" OR "diet* guideline*" OR (telephone N2 service*)</p> |
| 5 | <p>Environment Design/ OR Health Facility Environment/ OR Social Environment/ OR Social Planning/ OR Nutrition Policy/ OR Food/EC/ST OR Beverages/EC/ST OR Taxes/ OR cost control/ OR</p>                                                                                                                                                                                                                                                                                                                                                                                                                                                                                                                                                                                                                                                                                                                                                                                                                                                                                                                                                                                                                                                                                                                                                                                                                                                                                                                                                                                                                                                                                                                                                                                                                                                                                                                                                                                                                                                                                                                                                                                                                                                                                                                                                                                                                                                                                                                                                                                                                                                                                                                                                                                                                                                                                                                                                                                                                                                                                                                                                                                                                                                                              |

|           |                                                                                                                                                                                                                                                                                                                                                                                                                                                                                                                             |
|-----------|-----------------------------------------------------------------------------------------------------------------------------------------------------------------------------------------------------------------------------------------------------------------------------------------------------------------------------------------------------------------------------------------------------------------------------------------------------------------------------------------------------------------------------|
|           | Fiscal Policy/ OR Food Assistance/ OR Marketing/ OR Food Services/ OR Food, Fortified/ OR Food Labeling/ OR Product labeling/ OR Food Supply/ OR Legislation, Food/ OR Health Literacy/ OR Health Education/ OR Health Promotion/ OR Social Marketing/                                                                                                                                                                                                                                                                      |
| <b>6</b>  | 4 OR 5                                                                                                                                                                                                                                                                                                                                                                                                                                                                                                                      |
| <b>7</b>  | Food* OR "soft drink*" OR "energy drink*" OR "sugar* drink*" OR beverage* OR soda* OR SSB* OR fruit* OR vegetable* OR fat OR fats OR fatty) OR sugar* OR sucrose OR salt OR sodium* OR nutrient* OR diet* OR nutrition* OR Eat* OR calori* OR kilojoule* OR breastfe* OR feeding OR "body mass index" OR BMI OR "waist circumference*" OR obes* OR overweight OR "body weight" OR adipos* OR anthropometr* OR "weight loss" OR "weight gain" OR "store sale*" OR ((food* OR beverage* OR fruit* OR vegetable*) N5 Purchas*) |
| <b>8</b>  | "Body Weights and Measures"/ OR Body Weight/ OR Obesity/ OR Nutritional Status/ OR Feeding behaviour/                                                                                                                                                                                                                                                                                                                                                                                                                       |
| <b>9</b>  | 7 OR 8                                                                                                                                                                                                                                                                                                                                                                                                                                                                                                                      |
| <b>10</b> | interven* OR evaluat* OR trial* OR effectiv* OR impact* OR experiment* OR randomi?ed OR "pre test" OR pretest OR "post test" OR posttest OR "time series" OR "repeat cross-sectional" OR "follow up stud*" OR "pilot stud*" OR "before and after" OR ((policy or policies) N2 (analys* OR assess* or apprais* or monitor* or implement*)) OR "case stud*"                                                                                                                                                                   |
| <b>11</b> | Evaluation studies as Topic/ OR Clinical Study/ OR Empirical Research/ OR Proof of Concept Study/                                                                                                                                                                                                                                                                                                                                                                                                                           |
| <b>12</b> | 10 OR 11                                                                                                                                                                                                                                                                                                                                                                                                                                                                                                                    |
| <b>13</b> | 3 AND 6 AND 9 AND 12                                                                                                                                                                                                                                                                                                                                                                                                                                                                                                        |
