# Supplementary material for: Effects of food policy actions on Indigenous Peoples’ nutrition-related outcomes: a systematic review
Source: PubMed Central journal article supplement — BMJ Glob Health. 2020 Aug 18;5(8):e002442. doi: 10.1136/bmjgh-2020-002442 (PMC7437701; doi:10.1136/bmjgh-2020-002442), 2020-08-18
Supplement: bmjgh-2020-002442supp002.pdf [file bmjgh-2020-002442supp002.pdf]

## Supplementary File 2: Summary of included studies\*

| <b>N Nutrition label standards and regulations on the use of claims and implied claims on food</b> |                                          |                             |                                |                     |                                                               |                                                                                                                                                                                                                   |                         |                                                                                                                                                                                                                                                                                                                        |                                                                                                                               |
|----------------------------------------------------------------------------------------------------|------------------------------------------|-----------------------------|--------------------------------|---------------------|---------------------------------------------------------------|-------------------------------------------------------------------------------------------------------------------------------------------------------------------------------------------------------------------|-------------------------|------------------------------------------------------------------------------------------------------------------------------------------------------------------------------------------------------------------------------------------------------------------------------------------------------------------------|-------------------------------------------------------------------------------------------------------------------------------|
| Study                                                                                              | Study Design (quality)                   | Location (rurality)         | Duration                       | Targeted/ Universal | Participants**                                                | Intervention                                                                                                                                                                                                      | Indigenous involvement? | Outcomes                                                                                                                                                                                                                                                                                                               | Differential impact?                                                                                                          |
| Gorton et al. 2009                                                                                 | Cross-sectional survey<br><br>(moderate) | New Zealand (urban)         | 3 months (5 years post policy) | Universal           | 1525 adults:<br>26% Māori<br>72% female<br>mean age: 41 years | Comparing mandatory Nutrition Information Panel, multiple traffic light (MTL), simple traffic light (STL) and percentage of daily intake (%DI) labels.                                                            | None described          | <i>Label use:</i> Nutrition Information Panel used correctly to identify healthy food by 36% (95% CI 32, 41 %) of Māori and 64% (95% CI 60, 69 %) of European New Zealanders. %DI used correctly to identify healthy food by 32% (95% CI 28, 37 %) of Māori. 50% of Māori selected 'I don't know when using %DI label. | Traffic light labels were best understood across all ethnic and income groups.<br><br>[data for Māori participants not shown] |
| Ni Mhurchu et al. 2017                                                                             | RCT<br><br>(high)                        | New Zealand (urban & rural) | 5 weeks                        | Universal           | 1255 adults<br>18% Māori<br>89% female<br>mean age: 33 years  | <i>Starlight Trial:</i><br><br>Comparing mandatory Nutrition Information Panel (NIP), Traffic Light Label (TLL) and Health Star Rating (HSR) label-allocated using mobile phone application with barcode scanner. | None described          | <i>Food purchasing:</i> Overall differences in healthiness of food purchases not statistically significant. Frequent app users had significantly better nutrient profiling scores using TLL - 21.33 (95% CI: -22.63, -20.04) and HSR - 21.70 (95% CI: -22.97, -20.43) compared with NIP.                               | Effects did not vary by ethnicity (P-all interaction terms < 0.05).                                                           |

RCT= Randomised Controlled Trial; CI= Confidence Interval; SE= Standard Error; SD=Standard Deviation OR= Odds Ratio; RDI= Recommended Dietary Intake; BMI= Body Mass Index; zBMI=BMI z-score; SDS= Standard Deviation Score BP= Blood Pressure; BF= Body Fat; WC= Waist Circumference; SSB= sugar-sweetened beverages NTD= Neural Tube Defects

|                        |                                   |                                  |                             |           |                                                                    |                                                                                              |                                                                               |                                                                                                                                                                                                                                                                                                        |                                                                                                                                                     |
|------------------------|-----------------------------------|----------------------------------|-----------------------------|-----------|--------------------------------------------------------------------|----------------------------------------------------------------------------------------------|-------------------------------------------------------------------------------|--------------------------------------------------------------------------------------------------------------------------------------------------------------------------------------------------------------------------------------------------------------------------------------------------------|-----------------------------------------------------------------------------------------------------------------------------------------------------|
| Ni Mhurchu et al. 2018 | (high)                            |                                  |                             |           |                                                                    |                                                                                              |                                                                               | <i>Food purchasing:</i> Overall, products purchased after viewing the label were healthier than products whose labels were viewed, but not purchased. Mean difference in nutrient profiling score -0.90 (95% CI -1.54 to -0.26)                                                                        | Effect did not reach significance for Māori and Pacific participants. Difference in nutrient profiling score: -0.47 (95% CI -1.81, 0.88)            |
| Heart Foundation 2019  | Cross-sectional survey (low)      | Australia (urban and rural)      | 4 years                     | Universal | 7481 Australian adults (3.3% Aboriginal or Torres Strait Islander) | Health Star Rating interpretive food labelling system (voluntary)                            | none given                                                                    | <i>Food purchasing:</i> 64.4% of respondents reported that the Health Star Rating system influenced their purchasing behaviour. Of those influenced by the system, > 50% stated that they selected a healthier product. Overall, 23.4 % of all consumers reported selecting a product with more stars. | Indigenous peoples significantly more likely than non-Indigenous participants to report that HSR influenced purchasing decisions. (72.9% vs. 63.8%) |
| Gustafson & Prate 2019 | Cross-sectional survey (moderate) | United States of America (rural) | Single survey (over 3 days) | Targeted  | 115 Native American adults<br>71% female<br>mean age: 42 years     | Comparing generic label, a culturally tailored label (image + text) and tailored image only. | Local members of research team involved in label design. Protocol approved by | <i>Food purchasing:</i> Tailored label increased selection of the healthy item (p<0.001) and decreased selection of the unhealthy item                                                                                                                                                                 | Generic label also increased selection of healthy item (p<0.001)                                                                                    |

RCT= Randomised Controlled Trial; CI= Confidence Interval; SE= Standard Error; SD=Standard Deviation OR= Odds Ratio; RDI= Recommended Dietary Intake; BMI= Body Mass Index; zBMI=BMI z-score; SDS= Standard Deviation Score BP= Blood Pressure; BF= Body Fat; WC= Waist Circumference; SSB= sugar-sweetened beverages NTD= Neural Tube Defects

|                                                                                                         |                        |                                  |                                         |                                       |                                                                                                               |                                                                                                                                                                                                                                                                              | tribal authorities                                                                                  | (p<0.001). The tailored label significantly influenced the willingness to pay for a healthy product: \$2.44 more than when no label is present.                                                                                                              | but was less effective at influencing willingness to pay for healthy item.                                                                                       |
|---------------------------------------------------------------------------------------------------------|------------------------|----------------------------------|-----------------------------------------|---------------------------------------|---------------------------------------------------------------------------------------------------------------|------------------------------------------------------------------------------------------------------------------------------------------------------------------------------------------------------------------------------------------------------------------------------|-----------------------------------------------------------------------------------------------------|--------------------------------------------------------------------------------------------------------------------------------------------------------------------------------------------------------------------------------------------------------------|------------------------------------------------------------------------------------------------------------------------------------------------------------------|
| <b><u>O Offer healthy food and set standards in public institutions and other specific settings</u></b> |                        |                                  |                                         |                                       |                                                                                                               |                                                                                                                                                                                                                                                                              |                                                                                                     |                                                                                                                                                                                                                                                              |                                                                                                                                                                  |
| Study                                                                                                   | Study Design (quality) | Location (rurality)              | Duration                                | Targeted / Universal                  | Participants**                                                                                                | Intervention                                                                                                                                                                                                                                                                 | Indigenous involvement?                                                                             | Outcomes                                                                                                                                                                                                                                                     | Differential impact?                                                                                                                                             |
| Preschools/Childcare Centres                                                                            |                        |                                  |                                         |                                       |                                                                                                               |                                                                                                                                                                                                                                                                              |                                                                                                     |                                                                                                                                                                                                                                                              |                                                                                                                                                                  |
| Davis et al. 2016                                                                                       | RCT (moderate)         | United States of America (rural) | Intervention: 5 years<br>Study: 2 years | Targeted (Native American & Hispanic) | 980 pre-school children (intervention: n=500, control n=480); 38% Native American; 47% female; age: 2-5 years | Centre food service policy and professional development for staff; fruit and vegetable tasting for children<br><br>(multicomponent intervention, also nutrition and physical activity curriculum, take-home materials, family events; healthy options in stores)<br>Cultural | Cultural considerations in program curriculum. "Strong support" from families and community members | <i>Anthropometry:</i> No significant difference between comparison and intervention centres (p = 0.54; comparison slope = 0.038 [95% CI, 0.014 to 0.063]; intervention slope = 0.039 [95% CI, 0.014 to 0.063]; difference = 0.011 [95% CI -0.024 to 0.046]). | No heterogeneity of intervention effect was observed with respect to centre race/ethnicity (p = 0.38), gender (p = 0.41), or race/ethnicity × gender (p = 0.32). |

RCT= Randomised Controlled Trial; CI= Confidence Interval; SE= Standard Error; SD=Standard Deviation OR= Odds Ratio; RDI= Recommended Dietary Intake; BMI= Body Mass Index; zBMI=BMI z-score; SDS= Standard Deviation Score BP= Blood Pressure; BF= Body Fat; WC= Waist Circumference; SSB= sugar-sweetened beverages NTD= Neural Tube Defects

|                   |                               |                                |         |           |                                                                                                                 |                                                                                                                                                                                                                                         |                                                                                                                          |                                                                                                                                                                                                                                                                                               |                                                                                                                                                                                                                            |
|-------------------|-------------------------------|--------------------------------|---------|-----------|-----------------------------------------------------------------------------------------------------------------|-----------------------------------------------------------------------------------------------------------------------------------------------------------------------------------------------------------------------------------------|--------------------------------------------------------------------------------------------------------------------------|-----------------------------------------------------------------------------------------------------------------------------------------------------------------------------------------------------------------------------------------------------------------------------------------------|----------------------------------------------------------------------------------------------------------------------------------------------------------------------------------------------------------------------------|
| Gagne et al. 2013 | cross-sectional<br>(moderate) | Canada<br>(remote)             | 2 years | Targeted  | 217 Inuit children (attending childcare n=128, comparison n=89); 48% female; age: 11 months – 4.5 years         | Childcare centre menu (breakfast, lunch, and mid-afternoon snack) containing traditional foods and healthy store-bought foods; policy regarding foods and beverages served and staff training.<br><br>(Also nutrition education)        | “Collaboration with many individuals and organizations in Nunavik”<br><br>Inuit interpreter available during evaluation. | <i>Diet:</i> Children attending centre had a significantly ↑ intake of omega-3 (0.8% vs 0.5%), calcium (953 vs. 774mg), iron (11.2 vs. 8.1mg), as well as vegetables, fruit, grains milk and alternatives; more likely to meet core food group recommendations and iron RDI (p<0.0001)        | N/A                                                                                                                                                                                                                        |
| Rush et al. 2017  | Quasi-experimental<br>(Low)   | New Zealand<br>(urban & rural) | 3 years | Universal | 18744 New Zealand pre-school children (intervention: n= 6090, comparison: n=12,684); 31-34% Māori; age: 4 years | Childcare centre action plans: menu-planning, lunchbox/ snack guidelines, providing water only<br><br>(Also: workshops with educators and parents, class activities, interactive displays, newsletters/ printed resources, active play) | Two Māori facilitators                                                                                                   | <i>Anthropometry:</i> No change in obesity.<br><br><i>Health Outcomes:</i> For Māori, dental decay ↓ from 19.2% to 15.7% in intervention centres (trend p = 0.02), vs. non-significant ↓ from 21.5% to 20.2% among Māori in control centres. Difference by year three (8.7%:10.7% p = 0.026). | Prevalence of dental decay decreased significantly in non-Māori children regardless of centre attendance, but decline was steeper at intervention centres (↓ from 6.4% to 4.2% vs. 6.9% to 5.4%, trend p = 0.01 for both). |

RCT= Randomised Controlled Trial; CI= Confidence Interval; SE= Standard Error; SD=Standard Deviation OR= Odds Ratio; RDI= Recommended Dietary Intake; BMI= Body Mass Index; zBMI=BMI z-score; SDS= Standard Deviation Score BP= Blood Pressure; BF= Body Fat; WC= Waist Circumference; SSB= sugar-sweetened beverages NTD= Neural Tube Defects

| Primary/Elementary schools |                   |                                  |         |          |                                                                                                                      |                                                                                                                                                                                                                                                                   |                                                                                                                                                                                                                                                                   |                                                                                                                                                                                                                                                                                                                                                                               |     |
|----------------------------|-------------------|----------------------------------|---------|----------|----------------------------------------------------------------------------------------------------------------------|-------------------------------------------------------------------------------------------------------------------------------------------------------------------------------------------------------------------------------------------------------------------|-------------------------------------------------------------------------------------------------------------------------------------------------------------------------------------------------------------------------------------------------------------------|-------------------------------------------------------------------------------------------------------------------------------------------------------------------------------------------------------------------------------------------------------------------------------------------------------------------------------------------------------------------------------|-----|
| Caballero et al. 2003      | RCT<br>(high)     | United States of America (rural) | 3 years | Targeted | 1704 Native American school children (intervention: n=879, control: n=825); 48.3% female; mean age: 7.6 years        | <i>Pathways Study:</i><br><br>School food service guidelines and tools for reducing the fat content of school meals<br><br>(part of multicomponent intervention, also included nutrition and physical activity curriculum, take-home materials and family events) | Community-based formative research at each site. Project Steering Committee included two American Indian representatives elected by all American Indian study personnel.<br><br>Intervention approach utilised cultural principles, practices and learning modes. | <i>Anthropometry:</i><br>No significant difference<br><br><i>Diet:</i> Intervention group ↓ total energy intake (mean difference -265kcal 95%CI -437,-93) and ↓% energy from total fat (mean difference -2.5% 95%CI -3.9- -1.1) based on 24h recall.<br>Intervention group observed to ↓fat intake from school lunch but no difference in lunchtime energy intake b/w groups. | N/A |
| Himes et al. 2003          | RCT<br>(moderate) | United States of America (rural) | 3 years | Targeted | 470 Native American school children (intervention: n= 233, control: n= 247); 2 <sup>nd</sup> & 5 <sup>th</sup> grade |                                                                                                                                                                                                                                                                   |                                                                                                                                                                                                                                                                   | <i>Diet:</i> Based on observations, intervention group significantly ↓% energy from fat by 3.6% (SE 1.6, p<0.05) and saturated fat by 2.1% (SE 0.7, p<0.01) and a significantly ↑% energy from                                                                                                                                                                                | N/A |

RCT= Randomised Controlled Trial; CI= Confidence Interval; SE= Standard Error; SD=Standard Deviation OR= Odds Ratio; RDI= Recommended Dietary Intake; BMI= Body Mass Index; zBMI=BMI z-score; SDS= Standard Deviation Score BP= Blood Pressure; BF= Body Fat; WC= Waist Circumference; SSB= sugar-sweetened beverages NTD= Neural Tube Defects

|                  |                |                             |         |           |                                                                                                                                           |                                                                                                                                        |            |                                                                                                                                                                                                                                                                                                                                                                        |                                                                                                                        |
|------------------|----------------|-----------------------------|---------|-----------|-------------------------------------------------------------------------------------------------------------------------------------------|----------------------------------------------------------------------------------------------------------------------------------------|------------|------------------------------------------------------------------------------------------------------------------------------------------------------------------------------------------------------------------------------------------------------------------------------------------------------------------------------------------------------------------------|------------------------------------------------------------------------------------------------------------------------|
|                  |                |                             |         |           |                                                                                                                                           |                                                                                                                                        |            | carbohydrate (3.7% SE: 1.7). Intervention children reported lower 24-h intakes of energy (263 kcal, SE: 86, p<0.01), protein (9.5 g, SE 3.4p<0.01), total fat (15.1g, SE 4.1 p<0.001), saturated fat (6.0 g, SE 1.5, p<0.001), and polyunsaturated fat (2.3 g, SE 0.9, p<0.05); and % energy from fat (2.5%, SE 0.7, p<0.001) and saturated fat (1.1% SE 0.3 p<0.001). |                                                                                                                        |
| Rush et al. 2012 | RCT (moderate) | New Zealand (urban & rural) | 2 years | Universal | 1352 New Zealand primary school children (intervention: n=692, control: n=660); 26% Māori; 49% female; aged 5 (n=926) or 10 (n=426) years | <i>Project Energize:</i><br>School canteen makeovers, healthy fundraising.<br><br>(+school curriculum and modelling the preparation of | None given | <i>Anthropometry:</i><br>Intervention ↓ accumulation of body fat % SDS in the younger children (-0.14% (95% CI: -0.26--0.01). No effects on BMI SDS and %BF SDS in the older sample.                                                                                                                                                                                   | Māori subgroup analysis showed no effect of intervention. Over 2 years, Māori children had a non-significantly greater |

RCT= Randomised Controlled Trial; CI= Confidence Interval; SE= Standard Error; SD=Standard Deviation OR= Odds Ratio; RDI= Recommended Dietary Intake; BMI= Body Mass Index; zBMI=BMI z-score; SDS= Standard Deviation Score BP= Blood Pressure; BF= Body Fat; WC= Waist Circumference; SSB= sugar-sweetened beverages NTD= Neural Tube Defects

|                  |                          |                             |         |           |                                                                                                                                                                               |                                                                                                                                |  |                                                                                                                                                                                                                                                                                                                                                                                                                             |                                                                                                                                                                                                                                                                                              |
|------------------|--------------------------|-----------------------------|---------|-----------|-------------------------------------------------------------------------------------------------------------------------------------------------------------------------------|--------------------------------------------------------------------------------------------------------------------------------|--|-----------------------------------------------------------------------------------------------------------------------------------------------------------------------------------------------------------------------------------------------------------------------------------------------------------------------------------------------------------------------------------------------------------------------------|----------------------------------------------------------------------------------------------------------------------------------------------------------------------------------------------------------------------------------------------------------------------------------------------|
|                  |                          |                             |         |           |                                                                                                                                                                               | healthy lunches and snacks on a budget, information for parents professional development with a dietitian + physical activity) |  | Health Outcome: Intervention associated with ↓rate of ↑ in systolic BP SDS (-0.23, 95%CI: -0.43- -0.02, p=0.03) in older children.                                                                                                                                                                                                                                                                                          | increase in BMI, %BF and BP than Europeans.                                                                                                                                                                                                                                                  |
| Rush et al. 2014 | Quasi-experimental (low) | New Zealand (urban & rural) | 6 years | Universal | 6629 New Zealand primary school children (intervention: n= 4804 historical comparison group: n=1825); 36% Māori; 52% female; mean age 7.6 (younger group), 10.3 (older group) |                                                                                                                                |  | <i>Anthropometry:</i> Adjusted BMI was significantly lower in the intervention children compared to historical controls. Younger children were 31% (OR: 0.69, 95%CI: 0.54-0.88) and older children were 15% (OR: 0.88, 95%CI: 0.72-1.00) less likely to be obese or overweight than historical controls. Difference in BMI SDS: -7 (95%CI: -10.1- -3.6) in younger children and -4.4 (95%CI: -8.5- -4.7) in older children. | Intervention showed favourable, statistically significant outcomes among Māori children. No significant interaction between the intervention exposure and ethnicity observed for any outcomes suggesting intervention had similar relative effect among the different ethnic and SES groups. |

RCT= Randomised Controlled Trial; CI= Confidence Interval; SE= Standard Error; SD=Standard Deviation OR= Odds Ratio; RDI= Recommended Dietary Intake; BMI= Body Mass Index; zBMI=BMI z-score; SDS= Standard Deviation Score BP= Blood Pressure; BF= Body Fat; WC= Waist Circumference; SSB= sugar-sweetened beverages NTD= Neural Tube Defects

|                       |                             |                      |                |          |                                                                    |                                                                                                                                                                                                                                                                     |                                                                                                                                                                                                                                                                                       |                                                                                                                                                                                                                                                                        |     |
|-----------------------|-----------------------------|----------------------|----------------|----------|--------------------------------------------------------------------|---------------------------------------------------------------------------------------------------------------------------------------------------------------------------------------------------------------------------------------------------------------------|---------------------------------------------------------------------------------------------------------------------------------------------------------------------------------------------------------------------------------------------------------------------------------------|------------------------------------------------------------------------------------------------------------------------------------------------------------------------------------------------------------------------------------------------------------------------|-----|
| Hanbazaza et al. 2015 | Quasi-experimental<br>(low) | Canada<br>(rural)    | 2 school years | Targeted | 116 First Nations school children; 50% female; mean age: 9.8 years | School snack program: One raw food offered weekly to all children in year 1. Daily taste-testing of vegetables and fruit in year 2; incorporation of vegetables into school lunches. Garden boxes in each classroom Produce harvested used for classroom activities | Project arose from concerns within the community about children's health. Community Elders involved in planting garden boxes.<br><br>Community control over the research process. Research committee included Elders, educators, health workers, and other community representatives. | <i>Diet:</i> No significant changes in the home food consumption of any vegetable or fruit.                                                                                                                                                                            | N/A |
| Jones & Smith 2006    | Quasi-experimental<br>(Low) | Australia<br>(rural) | 6 months       | Targeted | 15 Aboriginal primary school children                              | Fresh fruit provided once or twice/school day at morning tea and lunch At least one piece of fruit per student each school day.                                                                                                                                     | In response to need identified by the Aboriginal Medical Service                                                                                                                                                                                                                      | <i>Health outcomes:</i> All 12 children who completed both points of testing had slight or greater hearing loss at baseline. Five (42%) had improved hearing at 6 months and seven (58%) had no change. Mean antibiotic prescriptions decreased from 7 to 1 per month. | N/A |

RCT= Randomised Controlled Trial; CI= Confidence Interval; SE= Standard Error; SD=Standard Deviation OR= Odds Ratio; RDI= Recommended Dietary Intake; BMI= Body Mass Index; zBMI=BMI z-score; SDS= Standard Deviation Score BP= Blood Pressure; BF= Body Fat; WC= Waist Circumference; SSB= sugar-sweetened beverages NTD= Neural Tube Defects



|                         |                             |                      |                                          |          |                                                                                                                 |                                                                                                                                                                                                                                                                                       |                                                                                                                                                                                                                                                              |                                                                                                                                                                                                                                                                                                                                                                         |     |
|-------------------------|-----------------------------|----------------------|------------------------------------------|----------|-----------------------------------------------------------------------------------------------------------------|---------------------------------------------------------------------------------------------------------------------------------------------------------------------------------------------------------------------------------------------------------------------------------------|--------------------------------------------------------------------------------------------------------------------------------------------------------------------------------------------------------------------------------------------------------------|-------------------------------------------------------------------------------------------------------------------------------------------------------------------------------------------------------------------------------------------------------------------------------------------------------------------------------------------------------------------------|-----|
| Jones & Smith 2007      | Quasi-experimental<br>(Low) | Australia<br>(rural) | 3 years                                  | Targeted | 12 Aboriginal primary school children                                                                           |                                                                                                                                                                                                                                                                                       |                                                                                                                                                                                                                                                              | <i>Nutritional status:</i> Mean vitamin C level ↑ from 21.9 μmol/L to 41.7 μmol/L. 44% (4/9) in the normal range, whereas 11/11 (100%) were deficient at baseline. <i>Health outcomes:</i> % with normal hearing ↑ from 5/12 (42%) to 9/11 (82%) post intervention.                                                                                                     | N/A |
| Kakekagumik et al. 2013 | Quasi-experimental<br>(Low) | Canada<br>(remote)   | Study 1: 12 months<br>Study 2: 18 months | Targeted | Study 1: n= 138;<br>Study 2: n= 47<br>First Nations school children;<br>3 <sup>rd</sup> & 4 <sup>th</sup> grade | School snack program consisting of fruit, milk, cheese, and rice cakes; school wide ban on high-fat and high-sugar foods and drinks.<br><br>(Part of multicomponent intervention: school-based curriculum; healthy options and nutrition information in the store, physical activity) | Program initiated by Community. Cultural considerations in intervention.<br><br>Guidance and input from Elders.<br><br>Two community members are co-authors. Program provided training and employment opportunities for a large number of community members. | <i>Anthropometry:</i> Mean BMI z-score ↑ from 1.0 to 1.3 (p=0.001). WC ↑ from 74.8 to 84.1 (p<0.001), Mean % body fat ↑ from 32-35%, p<0.001.<br><br><i>Diet:</i> Dietary fibre ↑ significantly from 11.6±8.0 to 13.4 ± 8.0. No significant ↓ in fat intake.: Milk intake ↑ from 0.8 serves (SE 0.2 to 1.1 (SE 0.2) % of energy from sugar ↓ from approx. 30% to < 25%. |     |

RCT= Randomised Controlled Trial; CI= Confidence Interval; SE= Standard Error; SD=Standard Deviation OR= Odds Ratio; RDI= Recommended Dietary Intake; BMI= Body Mass Index; zBMI=BMI z-score; SDS= Standard Deviation Score BP= Blood Pressure; BF= Body Fat; WC= Waist Circumference; SSB= sugar-sweetened beverages NTD= Neural Tube Defects

|                     |                                  |                  |                                         |          |                                                                                        |                                                                                                                                                                                                                                          |                                                                                                                                                                                                                                                                                                     |                                                                                                                                                                                                                                                                                                                                                                                                                                                                                                                                                    |     |
|---------------------|----------------------------------|------------------|-----------------------------------------|----------|----------------------------------------------------------------------------------------|------------------------------------------------------------------------------------------------------------------------------------------------------------------------------------------------------------------------------------------|-----------------------------------------------------------------------------------------------------------------------------------------------------------------------------------------------------------------------------------------------------------------------------------------------------|----------------------------------------------------------------------------------------------------------------------------------------------------------------------------------------------------------------------------------------------------------------------------------------------------------------------------------------------------------------------------------------------------------------------------------------------------------------------------------------------------------------------------------------------------|-----|
| Paradis et al. 2005 | Quasi-experimental<br>(Moderate) | Canada (rural)   | 8 years (2 years with comparison group) | Targeted | 657 First Nations school children (intervention: n= 458 comparison: n= 199); grade 1-6 | School nutrition policy: ban of junk foods sold on or brought onto school premises<br><br>(Part of multicomponent intervention. Also, health education, physical activity curriculum, community media advertisements, family activities) | Program initiated by the community.<br><br>Program supports capacity development of First Nations staff, volunteers and community members. Community held to return the results to the community, allow community input into interpretation of findings, and plan future directions of the project. | <i>Anthropometry:</i> Slower ↑ in skinfolds in intervention group: 36% vs. 65% (p <0.01). No difference in adjusted BMI increase. Students in 2002 had significantly ↑ risk of having higher BMI and skinfold thickness vs. baseline.<br><br><i>Diet:</i> No significant difference in nutrition measures between groups. Trend over 8 years: ↓ risk of consumption of high-sugar/high fat food items 65% (Fat OR: 0.35 (95%CI: 0.25–0.47) to 70% (sugar OR: 0.29 95%CI: 0.21–0.39) Fruit and vegetable intake also ↓ (OR: 0.25 95%CI: 0.18–0.35). | N/A |
| Story et al. 2012   | RCT                              | United States of | 2 years                                 | Targeted | 454 Native American school                                                             | Food-service staff were                                                                                                                                                                                                                  | Formative assessment with                                                                                                                                                                                                                                                                           | <i>Anthropometry:</i> No significant                                                                                                                                                                                                                                                                                                                                                                                                                                                                                                               | N/A |

RCT= Randomised Controlled Trial; CI= Confidence Interval; SE= Standard Error; SD=Standard Deviation OR= Odds Ratio; RDI= Recommended Dietary Intake; BMI= Body Mass Index; zBMI=BMI z-score; SDS= Standard Deviation Score BP= Blood Pressure; BF= Body Fat; WC= Waist Circumference; SSB= sugar-sweetened beverages NTD= Neural Tube Defects

|                      |                                          |                     |         |           |                                                                                    |                                                                                                                                                                                                                                                                                                                                                                          |                                                                                                |                                                                                                                                                                                                                                                                                                                                                                                                                                                       |                                                                       |
|----------------------|------------------------------------------|---------------------|---------|-----------|------------------------------------------------------------------------------------|--------------------------------------------------------------------------------------------------------------------------------------------------------------------------------------------------------------------------------------------------------------------------------------------------------------------------------------------------------------------------|------------------------------------------------------------------------------------------------|-------------------------------------------------------------------------------------------------------------------------------------------------------------------------------------------------------------------------------------------------------------------------------------------------------------------------------------------------------------------------------------------------------------------------------------------------------|-----------------------------------------------------------------------|
|                      | (moderate)                               | America (rural)     |         |           | children (intervention: n=267, control: n= 187); 48.9% female; mean age: 5.8 years | trained to provide low-calorie/fat foods, more fruits and vegetables, portion control. Teachers trained to limit daily snacks in the classroom, students encouraged to drink water. Non-food rewards e.g. stickers, stamps, pencils.<br><br>(Part of multicomponent intervention. Also: family events nutrition information for parents, give-aways + physical activity) | Lakota parents/caregivers, community members, and elders.<br><br>Trained Lakota research staff | change in mean BMI, BMI-Z, skinfolds or % body fat or obesity prevalence. Intervention associated with a significant net ↓ of 10% in the prevalence of overweight (effect size -10.14 se: 4.14). Difference in incidence of overweight of -11.4% (P = 0.033).<br><br><i>Diet:</i> Intervention group significantly ↓ intakes of SSB (-0.28 times/day, se: 0.11), whole milk (-0.22 times/day, se 0.07) and chocolate milk (-0.17 times/day, se 0.06). |                                                                       |
| Thornley et al. 2017 | Cross-sectional survey<br><br>(moderate) | New Zealand (urban) | 8 years | Universal | 3813 New Zealand primary school children (intervention: n= 428, comparison: n=     | School 'water only' policy, provided free water bottles for students, and modelling and                                                                                                                                                                                                                                                                                  | not given                                                                                      | <i>Health Outcomes:</i> mean no. carious teeth 0.37 lower (95% CI: 0.09–0.65) in intervention                                                                                                                                                                                                                                                                                                                                                         | Māori students at intervention school had lower levels of caries than |

RCT= Randomised Controlled Trial; CI= Confidence Interval; SE= Standard Error; SD=Standard Deviation OR= Odds Ratio; RDI= Recommended Dietary Intake; BMI= Body Mass Index; zBMI=BMI z-score; SDS= Standard Deviation Score BP= Blood Pressure; BF= Body Fat; WC= Waist Circumference; SSB= sugar-sweetened beverages NTD= Neural Tube Defects

|                            |                               |                                  |          |                                       |                                                                                                                                                                                      |                                                                                                                                                                            |                                                                                                                            |                                                                                                                                                                                                                                       |                                                                                                                                                                              |
|----------------------------|-------------------------------|----------------------------------|----------|---------------------------------------|--------------------------------------------------------------------------------------------------------------------------------------------------------------------------------------|----------------------------------------------------------------------------------------------------------------------------------------------------------------------------|----------------------------------------------------------------------------------------------------------------------------|---------------------------------------------------------------------------------------------------------------------------------------------------------------------------------------------------------------------------------------|------------------------------------------------------------------------------------------------------------------------------------------------------------------------------|
|                            |                               |                                  |          |                                       | 3385); 21% Māori; 47.0% female; age: 8-11 years                                                                                                                                      | reinforcing healthy eating behaviour among students and parents.                                                                                                           |                                                                                                                            | school, compared to other schools. School policy estimated to prevent 20 carious teeth /year (95% CI: 5–35).                                                                                                                          | those in other schools. Interaction terms between school and ethnicity not significant.                                                                                      |
| Triador et al. 2014        | Quasi-experimental (Low)      | Canada (rural)                   | 7 months | Targeted                              | 76 First Nations Children; 47% female; mean age: 9 years                                                                                                                             | 7-month classroom gardening + 4-month weekly snack program offering fruit or vegetable to each child                                                                       |                                                                                                                            | <i>Diet:</i> Non significant ↑ consumption of 10/17 vegetables and fruit between baseline and follow-up p >0.25                                                                                                                       | N/A                                                                                                                                                                          |
| Vogeltanz-Holm et al. 2018 | Quasi-experimental (Moderate) | United States of America (rural) | 3 years  | Universal policy + Targeted education | 308 primary school children, 34% Native American, 51.9% female; mean age 8.75<br><br>Compared to national sample without any Indigenous children (n= 208 at baseline, n= 356 at f/u) | Healthy school meals - reduced fat, saturated fat and sodium<br><br>(Also, school curriculum, take-home materials, family/ community nights, field trips to grocery store) | Research team included American Indian postdoctoral fellow. Partnered with tribal health leaders to adapt survey questions | <i>Anthropometry:</i> Significant ↓ in zBMI from 0.72 (95%CI 0.63, 0.81) to 0.63 (95%CI 0.54, 0.72). Obesity rates ↓ from 15.9% (95%CI 11.8, 20.0) to 12.7% (95%CI 9.0, 16.4) in intervention. No change in obesity in control group. | White students ↓ zBMI (0.66 to 0.61). Native American students' zBMI ↑ from baseline to 12 months (0.82 to 0.93) but did not differ from baseline at 3 years (0.82 to 0.85). |
| <b>Middle/high schools</b> |                               |                                  |          |                                       |                                                                                                                                                                                      |                                                                                                                                                                            |                                                                                                                            |                                                                                                                                                                                                                                       |                                                                                                                                                                              |

RCT= Randomised Controlled Trial; CI= Confidence Interval; SE= Standard Error; SD=Standard Deviation OR= Odds Ratio; RDI= Recommended Dietary Intake; BMI= Body Mass Index; zBMI=BMI z-score; SDS= Standard Deviation Score BP= Blood Pressure; BF= Body Fat; WC= Waist Circumference; SSB= sugar-sweetened beverages NTD= Neural Tube Defects

|                     |                             |                 |               |          |                                                                |                                                                                                                                                                                                                                                             |                                                                                                                    |                                                                                                                                                                                                                                                                                                                                                                                                     |     |
|---------------------|-----------------------------|-----------------|---------------|----------|----------------------------------------------------------------|-------------------------------------------------------------------------------------------------------------------------------------------------------------------------------------------------------------------------------------------------------------|--------------------------------------------------------------------------------------------------------------------|-----------------------------------------------------------------------------------------------------------------------------------------------------------------------------------------------------------------------------------------------------------------------------------------------------------------------------------------------------------------------------------------------------|-----|
| Saksvig et al. 2005 | Quasi-experimental<br>(low) | Canada (remote) | 1 school year | Targeted | 122 First Nations school children; 45% female; age: 7-14       | School policy banning high-fat and high-sugar snack foods, breakfast snack program providing daily fruit for students.<br><br>(Part of multicomponent intervention. Also school curriculum, weekly radio show, information for parents + physical activity) | School and community leaders involved in program development.<br><br>Native American learning styles incorporated. | <i>Anthropometry:</i> Mean BMI ↑ significantly from baseline by 0.95kg/m <sup>2</sup> (SD: 1.3) and % body fat ↑ by 1.18% (SD 4.0)<br><br><i>Diet:</i> % energy from fat ↓ for boys (34% vs. 31%; P < 0.05), but not for girls (34% vs. 33%; P < 0.2). No difference in the % energy from saturated fat or energy intake. Intervention exposure associated with meeting dietary fibre RDI (p<0.01). | N/A |
| Gates et al. 2013a  | Quasi-experimental<br>(Low) | Canada (remote) | 1 school year | Targeted | 30 First Nations school children; 67% female; age: 11-15 years | Healthy breakfast and snacks provided daily, community feast (also nutrition curriculum)                                                                                                                                                                    | Students involved in planning community feast Program coordinator = community member and former teacher            | <i>Diet:</i> No significant change in intake of milk/alternatives, calcium or vitamin D post program.                                                                                                                                                                                                                                                                                               | N/A |

RCT= Randomised Controlled Trial; CI= Confidence Interval; SE= Standard Error; SD=Standard Deviation OR= Odds Ratio; RDI= Recommended Dietary Intake; BMI= Body Mass Index; zBMI=BMI z-score; SDS= Standard Deviation Score BP= Blood Pressure; BF= Body Fat; WC= Waist Circumference; SSB= sugar-sweetened beverages NTD= Neural Tube Defects

|                        |                                  |                                  |           |          |                                                                                                                                                 |                                                                                                                                                                                                       |                                                                                                                    |                                                                                                                                                                                                                                                                                                                                                                                              |                                                                                                                                     |
|------------------------|----------------------------------|----------------------------------|-----------|----------|-------------------------------------------------------------------------------------------------------------------------------------------------|-------------------------------------------------------------------------------------------------------------------------------------------------------------------------------------------------------|--------------------------------------------------------------------------------------------------------------------|----------------------------------------------------------------------------------------------------------------------------------------------------------------------------------------------------------------------------------------------------------------------------------------------------------------------------------------------------------------------------------------------|-------------------------------------------------------------------------------------------------------------------------------------|
| Gates et al. 2013b     | Quasi-experimental<br>(Low)      | Canada (remote)                  | 12 months | Targeted | 113 First Nations school children; 55% female; age: 11-14 years                                                                                 | School snack program: at least one serve of vegetables and fruit, and milk and alternatives provided daily. An existing snack program was supplemented with milk and alternatives in a second school. | After one week control of the program was then handed over to a local volunteer                                    | <i>Diet:</i> No significant change from baseline in any of the dietary variables at 12 months. In the short term (1 week) calcium intake ↑ from 805.9 ± 552.0mg to 1027.6 ± 603.7 (p = .044) (school 1). Milk and alternatives ↑ from 1.7 +/- 1.7 to 2.1 +/-1.4 serves, p=0.034) and vitamin D intake ↑ from 2.5ug +/- 2.6 to 3.5ug +/- 3.4, p=0.022) improved in the short term (school 2). | N/A                                                                                                                                 |
| Ritenbaugh et al. 2003 | Quasi-experimental<br>(moderate) | United States of America (rural) | 3 years   | Targeted | 109 high school students (Intervention: n= 72 Native American, comparison: n= 37 Anglo students ); Intervention group: 57% female; mean age: 17 | School nutrition policy: water coolers for students; vending machine with diet drinks, only healthy snacks and sugar free beverages in the Wellness Centre. Increased fruits                          | Community representatives worked with the authors to on development, implementation, and evaluation of the project | <i>Anthropometry:</i> No significant differences in BMI<br><br><i>Diet:</i> SSB consumption ↓ by 4.8 oz./day/ student replaced by 24 oz. water and 7.8 oz. diet                                                                                                                                                                                                                              | By year 3, insulin values for males equalled Anglo comparison values, females' had declined but were still higher than Anglo values |

RCT= Randomised Controlled Trial; CI= Confidence Interval; SE= Standard Error; SD=Standard Deviation OR= Odds Ratio; RDI= Recommended Dietary Intake; BMI= Body Mass Index; zBMI=BMI z-score; SDS= Standard Deviation Score BP= Blood Pressure; BF= Body Fat; WC= Waist Circumference; SSB= sugar-sweetened beverages NTD= Neural Tube Defects

|                     |                                 |                 |         |          |                                                                                                                                                                                           |                                                                                                                                                                                                                   |                                                               |                                                                                                                                                                                                                                                                                                                                                                                                                    |     |
|---------------------|---------------------------------|-----------------|---------|----------|-------------------------------------------------------------------------------------------------------------------------------------------------------------------------------------------|-------------------------------------------------------------------------------------------------------------------------------------------------------------------------------------------------------------------|---------------------------------------------------------------|--------------------------------------------------------------------------------------------------------------------------------------------------------------------------------------------------------------------------------------------------------------------------------------------------------------------------------------------------------------------------------------------------------------------|-----|
|                     |                                 |                 |         |          |                                                                                                                                                                                           | and vegetables and decreased fat in school lunches.<br><br>(Also, nutrition and diabetes prevention curriculum, information displays and local radio announcements)                                               |                                                               | soda/week/student.<br><br><i>Health outcomes:</i> Plasma insulin levels declined through-out the study (p = 0.06 to p= 0.000 for trends).                                                                                                                                                                                                                                                                          |     |
| Skinner et al. 2012 | Quasi-experimental<br><br>(Low) | Canada (remote) | 3 years | Targeted | Study 1: 63 First Nations school students (intervention: n=23, comparison: n=40); Study 2: 50 First Nations students (intervention: n=26, comparison: n=24); 57% female; age: 10-18 years | School snack program: provided morning breakfast snack to all students and an afternoon (fruit/milk) snack to all elementary students each school day. Traditional foods sometimes offered during special events. | Dedicated 'program champion' and widespread community support | <i>Diet:</i> Study1: Participants had higher fruit and vegetable (7.5 vs 3.4 serves), folate (420 vs 270 µg), fibre (18 vs 8 g), vitamin C (223 vs 94 mg), calcium (1055 vs 719 mg) and iron (16.5 vs 11.7 mg). Study 2: participants had higher intakes of milk (3.3 vs 2.2 serves), vitamin A (697 vs 551 RE) calcium (1186 vs 837 mg), vitamin D (6.9 vs 4.4 µg) ↓ intakes of 'Other' foods (6.0 vs 7.2 serves) | N/A |

RCT= Randomised Controlled Trial; CI= Confidence Interval; SE= Standard Error; SD=Standard Deviation OR= Odds Ratio; RDI= Recommended Dietary Intake; BMI= Body Mass Index; zBMI=BMI z-score; SDS= Standard Deviation Score BP= Blood Pressure; BF= Body Fat; WC= Waist Circumference; SSB= sugar-sweetened beverages NTD= Neural Tube Defects

| <b>U Use economic tools to address food affordability and purchase incentives</b> |                                      |                     |           |                      |                                                                  |                                                                                                                                                                     |                                                                                                                                                                                                                                                                                        |                                                                                                                                                                                                                                                                                             |                      |
|-----------------------------------------------------------------------------------|--------------------------------------|---------------------|-----------|----------------------|------------------------------------------------------------------|---------------------------------------------------------------------------------------------------------------------------------------------------------------------|----------------------------------------------------------------------------------------------------------------------------------------------------------------------------------------------------------------------------------------------------------------------------------------|---------------------------------------------------------------------------------------------------------------------------------------------------------------------------------------------------------------------------------------------------------------------------------------------|----------------------|
| Study                                                                             | Study Design (quality)               | Location (rurality) | Duration  | Targeted / Universal | Participants**                                                   | Intervention                                                                                                                                                        | Indigenous involvement?                                                                                                                                                                                                                                                                | Outcomes                                                                                                                                                                                                                                                                                    | Differential impact? |
| <b>Subsidies/discounts</b>                                                        |                                      |                     |           |                      |                                                                  |                                                                                                                                                                     |                                                                                                                                                                                                                                                                                        |                                                                                                                                                                                                                                                                                             |                      |
| Black et al. 2013                                                                 | Quasi-experimental<br><br>(moderate) | Australia (rural)   | 12 months | Targeted             | 174 Aboriginal school children, 53% female, mean age: 7.6 years, | Each family paid \$5 for a weekly box containing \$40-\$60 worth of fruit and vegetables. Mandatory bread flour fortification with folic acid occurred concurrently | Initiated by the Aboriginal Health Service. Aboriginal health workers led health promotion<br>Initiated by the Aboriginal Health Service. Aboriginal health workers led health promotion<br>Initiated by the Aboriginal Health Service. Aboriginal health workers led health promotion | <i>Biochemistry:</i> ↑ mean plasma carotenoids: b-cryptoxanthin (+28.9 nmol/L, 95% CI: 4.2-53.6), lutein-zeaxanthin (+39.9 nmol/L, 95% CI: 6.2-72.5) and vitamin C levels (+10.1 μmol/L 95%CI 2.0-18.1)<br><br><i>Diet:</i> No changes in self-reported F&V intake using 24h dietary recall | N/A                  |
| Black et al. 2014                                                                 | (Low)                                |                     |           |                      |                                                                  |                                                                                                                                                                     |                                                                                                                                                                                                                                                                                        | <i>Biochemistry:</i> Mean RBC folate z-score ↑ +0.55 (95%CI 0.36-0.74) 60% in one site and 96% in another exceeded reference range                                                                                                                                                          | N/A                  |

RCT= Randomised Controlled Trial; CI= Confidence Interval; SE= Standard Error; SD=Standard Deviation OR= Odds Ratio; RDI= Recommended Dietary Intake; BMI= Body Mass Index; zBMI=BMI z-score; SDS= Standard Deviation Score BP= Blood Pressure; BF= Body Fat; WC= Waist Circumference; SSB= sugar-sweetened beverages NTD= Neural Tube Defects



|                     |               |                     |          |           |                           |                                                                                   |                                                                                                                                                                                     |                                                                                                                                                                                                                                                                                                                                            |                                                                                                                                                                  |
|---------------------|---------------|---------------------|----------|-----------|---------------------------|-----------------------------------------------------------------------------------|-------------------------------------------------------------------------------------------------------------------------------------------------------------------------------------|--------------------------------------------------------------------------------------------------------------------------------------------------------------------------------------------------------------------------------------------------------------------------------------------------------------------------------------------|------------------------------------------------------------------------------------------------------------------------------------------------------------------|
| Black et al. 2013b  | (moderate)    |                     |          |           |                           |                                                                                   |                                                                                                                                                                                     | <p><i>Health Outcomes:</i><br/>↓ in antibiotics prescribed (-0.5 prescriptions/year; 95% CI, -0.8, -0.2) and ↓ illness-related visits to health services (-0.6; 95%CI -1.2--0.001).</p> <p><i>Biochemistry:</i><br/>small ↑ in mean haemoglobin (3.1 g/L; 95% CI, 1.4–4.8 g/L) but no significant change in iron deficiency or anaemia</p> | N/A                                                                                                                                                              |
| Blakely et al. 2011 | RCT<br>(high) | New Zealand (urban) | 24 weeks | Universal | 1104 adults, 22.5% Māori, | Price discounts (12.5%) on eligible healthy foods +/- tailored education material | Partnership with Māori communities; Formative focus groups led by Māori facilitators; community-based recruitment strategies involving Māori recruiters; Māori researchers on team. | <p><i>Food purchasing:</i><br/>All Participants: ↑ in the amount of healthier foods purchased was greater for participants who received price discounts compared with those who did not (0.79 kg/ week, 95% CI 0.43, 1.16). No effect for education alone.</p>                                                                             | European/ other ethnicities had a 1.02kg/week (95% CI 0.60, 1.43) ↑ in healthier food purchases while Māori had a ↓ of 0.15 kg/week with (95% CI -1.10 to 0.80). |

RCT= Randomised Controlled Trial; CI= Confidence Interval; SE= Standard Error; SD=Standard Deviation OR= Odds Ratio; RDI= Recommended Dietary Intake; BMI= Body Mass Index; zBMI=BMI z-score; SDS= Standard Deviation Score BP= Blood Pressure; BF= Body Fat; WC= Waist Circumference; SSB= sugar-sweetened beverages NTD= Neural Tube Defects

|                          |                    |                       |          |          |                                                                                            |                                                                                                                                           |                                                                                                                             |                                                                                                                                                                                                                                                                                                                                                                                                                                                                                                                                                    |     |
|--------------------------|--------------------|-----------------------|----------|----------|--------------------------------------------------------------------------------------------|-------------------------------------------------------------------------------------------------------------------------------------------|-----------------------------------------------------------------------------------------------------------------------------|----------------------------------------------------------------------------------------------------------------------------------------------------------------------------------------------------------------------------------------------------------------------------------------------------------------------------------------------------------------------------------------------------------------------------------------------------------------------------------------------------------------------------------------------------|-----|
| Brimblecombe et al. 2017 | RCT<br>(high)      | Australia<br>(remote) | 24 weeks |          | Total population: 8515, approx. 95% Aboriginal (10 intervention stores, 10 control stores) | 20% price discount on fruit and vegetables, all bottled water, and diet soft drinks, discount promoted in stores +/- education activities | Collaboration with community leaders and Aboriginal organisations. Trained local residents to maximise consumer engagement. | <p><i>Food purchasing:</i><br/>Price discount ↑ fruit and vegetable sales by 12.7% (95% CI 4.1, 22.1), and 19.8% (95%CI 6.2, 35.1) after discount removed - an ↑ of 12 g and 18 g/capita/day. Consumer education: added 7.6% ↑ in fruit and veg sales (95% CI -3.6 to 20.2). Water ↑ by 10.0% (-2.5 to 24.2) with the price discount alone.</p> <p><i>Unintended:</i><br/>Sodium ↑ 8.3% (95% CI: 0.5,16.6) during and 13.8%, after discount (95%CI: 1.8,27.3) Energy ↑ 6.7%, during (95%CI 0.1,13.8) and 13.8% after discount (95%CI 3.2-25.6)</p> | N/A |
| Brown et al. 2019        | Quasi-experimental | Australia<br>(remote) | 32 weeks | Targeted | Total population: 1400, 90% Aboriginal or                                                  | Store customers offered a fruit and vegetable voucher to the                                                                              | Initiated by Aboriginal health service, formative research with                                                             | <p><i>Food purchasing:</i><br/>No impact on fruit and vegetable sales. Total fruit</p>                                                                                                                                                                                                                                                                                                                                                                                                                                                             | N/A |

RCT= Randomised Controlled Trial; CI= Confidence Interval; SE= Standard Error; SD=Standard Deviation OR= Odds Ratio; RDI= Recommended Dietary Intake; BMI= Body Mass Index; zBMI=BMI z-score; SDS= Standard Deviation Score BP= Blood Pressure; BF= Body Fat; WC= Waist Circumference; SSB= sugar-sweetened beverages NTD= Neural Tube Defects

|                      |                               |                    |           |          |                                                               |                                                                                                                                                                  |                                                                                                                                                                                               |                                                                                                                                                                                                             |     |
|----------------------|-------------------------------|--------------------|-----------|----------|---------------------------------------------------------------|------------------------------------------------------------------------------------------------------------------------------------------------------------------|-----------------------------------------------------------------------------------------------------------------------------------------------------------------------------------------------|-------------------------------------------------------------------------------------------------------------------------------------------------------------------------------------------------------------|-----|
|                      | (moderate)                    |                    |           |          | Torres Strait Islander                                        | value of \$10 each time a minimum amount (\$15-\$20) was spent on fruit and vegetables.                                                                          | store staff to inform intervention design, Torres Strait Islander researcher.                                                                                                                 | sales ↓ 7% from 41 to 38g/person/day (p = 0.01). Non-significant ↓ in sales of veg and all food and drinks                                                                                                  |     |
| Ferguson et al. 2017 | Natural experiment (moderate) | Australia (remote) | 12 months | Targeted | 18 Community Stores, majority Aboriginal population           | Price discount strategies (each about 10%) targeting grocery products; fresh fruit and vegetables or diet soft-drinks                                            | Strategies in response to community feedback and unanimous support for reducing the price of basic, healthy food and beverages. An Indigenous community volunteer is as an author             | <i>Food purchasing:</i> No impact on sales of fruit and vegetables, groceries or diet soft-drinks was detected. All drink categories ↓. Mean ↓ of -19% (95%CI: --28, -10) for soft drinks (p<0.001)         | N/A |
| Lee et al. 2016      | Natural experiment (Low)      | Australia (remote) | 5+ years  | Targeted | Total population approx. 3,000. Majority Aboriginal. 7 stores | Remote store nutrition policy and subsidy scheme to provide healthy food in parity with city prices. Cross-subsidised the cost of healthy and less healthy foods | Policy developed by Aboriginal organisations in response to community concerns about the availability, accessibility and affordability of healthy food and their lack of control over stores. | <i>Diet:</i> Fruit and vegetable contribution to energy intake ↑ by 85%. Energy intake from sugar ↓ 25% (from 30% to 22%), but total carbohydrate remained the same (48%). Micronutrient intake ↑ generally |     |

RCT= Randomised Controlled Trial; CI= Confidence Interval; SE= Standard Error; SD=Standard Deviation OR= Odds Ratio; RDI= Recommended Dietary Intake; BMI= Body Mass Index; zBMI=BMI z-score; SDS= Standard Deviation Score BP= Blood Pressure; BF= Body Fat; WC= Waist Circumference; SSB= sugar-sweetened beverages NTD= Neural Tube Defects

|                          |                                     |                       |              |          |                                                                 |                                                                                                                                                                                                                                                                                       |            |                                                                                                                                                                                                                                                                                                                                               |                                                                                                                                                                                                                         |  |
|--------------------------|-------------------------------------|-----------------------|--------------|----------|-----------------------------------------------------------------|---------------------------------------------------------------------------------------------------------------------------------------------------------------------------------------------------------------------------------------------------------------------------------------|------------|-----------------------------------------------------------------------------------------------------------------------------------------------------------------------------------------------------------------------------------------------------------------------------------------------------------------------------------------------|-------------------------------------------------------------------------------------------------------------------------------------------------------------------------------------------------------------------------|--|
|                          |                                     |                       |              |          |                                                                 |                                                                                                                                                                                                                                                                                       |            |                                                                                                                                                                                                                                                                                                                                               | Unintended:<br>Energy intake/<br>person / day ↑<br>11% from 13,250<br>±779 kJ to 14,720<br>±820 kJ from 1986<br>-2012. Energy<br>from saturated<br>fat ↑ 20% (from<br>15% to 18%). ↑<br>discretionary<br>foods and SSB. |  |
| <b>Income Management</b> |                                     |                       |              |          |                                                                 |                                                                                                                                                                                                                                                                                       |            |                                                                                                                                                                                                                                                                                                                                               |                                                                                                                                                                                                                         |  |
| Brimblecombe et al. 2010 | Natural<br>experiment<br>(moderate) | Australia<br>(remote) | 12-18 months | Targeted | Total<br>population:<br>5957, majority<br>Aboriginal            | 50% of social<br>security<br>payments to<br>Indigenous<br>people<br>quarantined for<br>essential items<br>such as food,<br>clothes, rent,<br>utilities,<br>medicine and<br>household<br>goods. Cannot<br>be used for<br>tobacco, alcohol,<br>pornography<br>and gambling<br>products. | None       | Food purchasing:<br><br>Intervention had<br>no effect on total<br>food and drink<br>sales or fruit and<br>vegetable sales.<br>Rate of monthly<br>soft drink sales per<br>capita<br>significantly ↓<br>during first 4-6<br>months (-215<br>95%CI: -367 to<br>-64) and then<br>↑significantly<br>thereafter (Post:<br>157 95%CI: 44 to<br>2712) | N/A                                                                                                                                                                                                                     |  |
| Doyle et al. 2017        | Natural<br>Experiment<br>(moderate) | Australia<br>(remote) | 16 months    | Targeted | 1,153 Aboriginal<br>babies born<br>between 17<br>September 2007 | Compulsory<br>income<br>management-<br>half of social                                                                                                                                                                                                                                 | none given | Restricting welfare<br>payments reduced<br>birthweight by<br>over 100 grams                                                                                                                                                                                                                                                                   | N/A                                                                                                                                                                                                                     |  |

RCT= Randomised Controlled Trial; CI= Confidence Interval; SE= Standard Error; SD=Standard Deviation OR= Odds Ratio; RDI= Recommended Dietary Intake; BMI= Body Mass Index; zBMI=BMI z-score; SDS= Standard Deviation Score BP= Blood Pressure; BF= Body Fat; WC= Waist Circumference; SSB= sugar-sweetened beverages NTD= Neural Tube Defects

|                                                                                  |                               |                                              |                                                       |                      | and 31 January 2009.                                      | security payments quarantined for priority needs such as food, housing, bills and clothing                                                              |                                                                                   | (adjusted effect size -119g, SE:54.76; p<0.05) and increased the probability of low birthweight by around 30%                                                                                           |                                                                                                                                                                                             |
|----------------------------------------------------------------------------------|-------------------------------|----------------------------------------------|-------------------------------------------------------|----------------------|-----------------------------------------------------------|---------------------------------------------------------------------------------------------------------------------------------------------------------|-----------------------------------------------------------------------------------|---------------------------------------------------------------------------------------------------------------------------------------------------------------------------------------------------------|---------------------------------------------------------------------------------------------------------------------------------------------------------------------------------------------|
| <b>R Restrict food advertising and other forms of commercial promotion (n=0)</b> |                               |                                              |                                                       |                      |                                                           |                                                                                                                                                         |                                                                                   |                                                                                                                                                                                                         |                                                                                                                                                                                             |
| <b>I Improve nutritional quality of whole food supply</b>                        |                               |                                              |                                                       |                      |                                                           |                                                                                                                                                         |                                                                                   |                                                                                                                                                                                                         |                                                                                                                                                                                             |
| Study                                                                            | Study Design (quality)        | Location (rurality)                          | Duration                                              | Targeted / Universal | Participants**                                            | Intervention                                                                                                                                            | Indigenous involvement?                                                           | Outcomes                                                                                                                                                                                                | Differential impact?                                                                                                                                                                        |
| <b>Voluntary fortification- folic acid</b>                                       |                               |                                              |                                                       |                      |                                                           |                                                                                                                                                         |                                                                                   |                                                                                                                                                                                                         |                                                                                                                                                                                             |
| Bower et al. 2004                                                                | Natural experiment (moderate) | Australia (state-wide: urban, rural, remote) | Health promotion: 2.5 years<br>Fortification: 4 years | Universal            | 542 954 births, 5.3% Aboriginal or Torres Strait Islander | Voluntary folic acid fortification (bread and breakfast cereals) + health promotion to encourage women to take a periconceptional folic acid supplement | Concurrent community-based study to assess knowledge of folate, Aboriginal author | <i>Health outcome:</i> NTD prevalence rates for non-Indigenous infants ↓ from 1.89/1000 births, to 1.29/1000 following voluntary fortification. For Aboriginal infants, there was no evidence of a fall | Baseline NTD rates were 42% higher in Aboriginal infants (PR=1.42; [CI 1.04, 1.94]). Disparity ↑ to almost double following voluntary fortification. (PR 1.98; [CI 1.25, 3.15]). (P=0.035). |
| Bower et al. 2009                                                                | Natural experiment (moderate) | Australia (state-wide: urban,                | Health promotion: 2.5 years                           | Universal            | 667,825 births 6% Aboriginal or Torres Strait Islander    | Voluntary folic acid fortification (bread and breakfast                                                                                                 | None given                                                                        | <i>Health outcome:</i> Overall NTD rates ↓ during period of voluntary                                                                                                                                   | Prevalence ratios, comparing fortification                                                                                                                                                  |

RCT= Randomised Controlled Trial; CI= Confidence Interval; SE= Standard Error; SD=Standard Deviation OR= Odds Ratio; RDI= Recommended Dietary Intake; BMI= Body Mass Index; zBMI=BMI z-score; SDS= Standard Deviation Score BP= Blood Pressure; BF= Body Fat; WC= Waist Circumference; SSB= sugar-sweetened beverages NTD= Neural Tube Defects

|                                            |                          |                   |                         |           |                                                            |                                                                                                                                                                  |                                              |                                                                                                                                                                                              |                                                                                                                               |
|--------------------------------------------|--------------------------|-------------------|-------------------------|-----------|------------------------------------------------------------|------------------------------------------------------------------------------------------------------------------------------------------------------------------|----------------------------------------------|----------------------------------------------------------------------------------------------------------------------------------------------------------------------------------------------|-------------------------------------------------------------------------------------------------------------------------------|
|                                            |                          | rural, remote)    | Fortification: 10 years |           |                                                            | cereals) + health promotion to encourage women to take a peri- {Bower, {Bower, 2016 #10854} {Bower, 2004 #10853} 2009 #10851} conceptional folic acid supplement |                                              | fortification. For Aboriginal only a slight ↓ in NTD rates.                                                                                                                                  | with pre-fortification, were 0.70 (CI, 0.61–0.79) for non-Aboriginal infants and 0.90 (CI, 0.61–1.32) for Aboriginal infants. |
| D'Onise et al. 2012                        | Natural experiment (low) | Australia (rural) | 7 years                 | Universal | 567 adults, 99% Aboriginal mean age 39.6 years, 50% female | Voluntary folic acid fortification (bread and breakfast cereals)                                                                                                 | Support from peak Indigenous health councils | <i>Biochemistry:</i> Prevalence of low RBC ↑ from 15.9% at baseline to 36.9% at follow up (p<0.001). 12.8% women of child bearing age deficient at baseline and 33.6% at follow up (p=0.06). |                                                                                                                               |
| <b>Mandatory fortification- folic acid</b> |                          |                   |                         |           |                                                            |                                                                                                                                                                  |                                              |                                                                                                                                                                                              |                                                                                                                               |
| Arbour et al. 2007                         | Case control (low)       | Canada (remote)   | Since 1998              | Universal | 76 Inuit mothers of heart defect cases (n=40) and controls | Mandatory fortification of flour, rice, pasta, cornmeal, and                                                                                                     | None given                                   | <i>Biochemistry:</i> No difference between RBC folate of cases and                                                                                                                           | N/A                                                                                                                           |

RCT= Randomised Controlled Trial; CI= Confidence Interval; SE= Standard Error; SD=Standard Deviation OR= Odds Ratio; RDI= Recommended Dietary Intake; BMI= Body Mass Index; zBMI=BMI z-score; SDS= Standard Deviation Score BP= Blood Pressure; BF= Body Fat; WC= Waist Circumference; SSB= sugar-sweetened beverages NTD= Neural Tube Defects

|                    |                               |                                   |                                     |           |                                                                                                      |                                                                         |                                                                |                                                                                                                                                                                                                                                                                                 |                                                                                                                             |
|--------------------|-------------------------------|-----------------------------------|-------------------------------------|-----------|------------------------------------------------------------------------------------------------------|-------------------------------------------------------------------------|----------------------------------------------------------------|-------------------------------------------------------------------------------------------------------------------------------------------------------------------------------------------------------------------------------------------------------------------------------------------------|-----------------------------------------------------------------------------------------------------------------------------|
|                    |                               |                                   |                                     |           | (n=36); age 18-45 years                                                                              | other grain products with folic acid.                                   |                                                                | controls (p=0.37). Mean RBC folate among women of childbearing age met goal of fortification.                                                                                                                                                                                                   |                                                                                                                             |
| Bower et al. 2016  | Natural experiment (moderate) | Australia (urban + rural)         | 4 years                             | Universal | 95 Aboriginal men & women aged 16-44 years, 62% female<br><br>52 919 Aboriginal births over 25 years | Mandatory fortification of wheat flour for bread making with folic acid | Approved by West Australian Aboriginal Health Ethics Committee | <i>Biochemistry:</i> No participant had RBC folate in the deficient range vs. 10% of women and 26% men at baseline. Mean difference in RBC after fortification 158 (95% CI 121–19); p< 0.0001).<br><br><i>Health outcome:</i> NTD prevalence ↓by 68% (prevalence ratio 0.32 (95% CI 0.15–0.69)) |                                                                                                                             |
| Hilder et al. 2016 | Natural Experiment (moderate) | Australia (urban+ rural + remote) | Study: 5 Year Intervention: 2 years | Universal | 1,030 Australian babies with NTD from pregnancies that ended in 2007 to 2011                         | Mandatory fortification of wheat flour for bread making with folic acid | none given                                                     | Significant ↓ of 14.4% (95%CI 0.7, 26.2) NTD per 10,000 conceptions in the standard period relative to the NTD rates in the baseline period                                                                                                                                                     | NTD rates for babies with Indigenous mothers ↓ by 74.2% (95%CI 0.7, 87.7) Modest and non-significant ↓ NTD by 9.1% for non- |

RCT= Randomised Controlled Trial; CI= Confidence Interval; SE= Standard Error; SD=Standard Deviation OR= Odds Ratio; RDI= Recommended Dietary Intake; BMI= Body Mass Index; zBMI=BMI z-score; SDS= Standard Deviation Score BP= Blood Pressure; BF= Body Fat; WC= Waist Circumference; SSB= sugar-sweetened beverages NTD= Neural Tube Defects

|                                        |                                   |                            |           |           |                                                                                               |                                                                                                                      |            |                                                                                                                                                                                                                     |                                                                                                                                                                                |
|----------------------------------------|-----------------------------------|----------------------------|-----------|-----------|-----------------------------------------------------------------------------------------------|----------------------------------------------------------------------------------------------------------------------|------------|---------------------------------------------------------------------------------------------------------------------------------------------------------------------------------------------------------------------|--------------------------------------------------------------------------------------------------------------------------------------------------------------------------------|
|                                        |                                   |                            |           |           |                                                                                               |                                                                                                                      |            |                                                                                                                                                                                                                     | Indigenous babies                                                                                                                                                              |
| Slagman et al. 2019                    | repeat cross-sectional (low)      | Australia (urban + remote) | 6 years   | universal | 13,929 adults, 30.4% Aboriginal or Torres Strait Islander, median age: 52 years, 54.2% female | Mandatory fortification of wheat flour for bread making with folic acid                                              | None given | <i>Biochemistry:</i> Prevalence of folic acid deficiency ↓ from 12.2% to 1.5% (p<0.001). Overall relative risk reduction: 88%.                                                                                      | Significant ↓ in relative risk for both: Indigenous (20.5% pre vs. 1.6% post) and non-Indigenous people (7.4% vs. 1.5%).                                                       |
| <b>Mandatory fortification- iodine</b> |                                   |                            |           |           |                                                                                               |                                                                                                                      |            |                                                                                                                                                                                                                     |                                                                                                                                                                                |
| Mallard & Houghton 2013                | Cross sectional survey (moderate) | New Zealand (urban)        | 18 months | universal | 677 postpartum women (14% Māori), median age 31 years                                         | Mandatory iodine fortification of salt used in bread (+ supplement recommendation/ subsidisation for pregnant women) | None given | <i>Diet:</i> 22 % (95% CI17-26) of all women would have fallen below the EAR for non-pregnant, non-lactating women without iodine fortification of bread. Not significantly different for Māori: 15% (95%CI: 3-27). | Pre-conception: only 5% Māori women (95%CI 0-11) below EAR vs. 17% (95%CI 13-22) for Europeans but Māori women significantly less likely to meet EAR in pregnancy (a P ≤ 0.05) |
| Singh et al. 2019                      | Natural experiment                | Australia (urban,          | 5-8 years | universal | 368 young adults (77% Aboriginal);                                                            | Mandatory iodine fortification of                                                                                    | None given | <i>Biochemistry:</i> Overall median Urinary Iodine                                                                                                                                                                  | Median UIC for pregnant Indigenous                                                                                                                                             |

RCT= Randomised Controlled Trial; CI= Confidence Interval; SE= Standard Error; SD=Standard Deviation OR= Odds Ratio; RDI= Recommended Dietary Intake; BMI= Body Mass Index; zBMI=BMI z-score; SDS= Standard Deviation Score BP= Blood Pressure; BF= Body Fat; WC= Waist Circumference; SSB= sugar-sweetened beverages NTD= Neural Tube Defects



|                                                                                                  |                                      |                    |          |          |                                                                             |                                                                                             |                                                                                                                                 |                                                                                                                                                                                                                                                                           |                                                                                                                                                                               |
|--------------------------------------------------------------------------------------------------|--------------------------------------|--------------------|----------|----------|-----------------------------------------------------------------------------|---------------------------------------------------------------------------------------------|---------------------------------------------------------------------------------------------------------------------------------|---------------------------------------------------------------------------------------------------------------------------------------------------------------------------------------------------------------------------------------------------------------------------|-------------------------------------------------------------------------------------------------------------------------------------------------------------------------------|
|                                                                                                  | (moderate)                           | rural, remote)     |          |          | mean age: 24.9, 48% female                                                  | salt used for bread making<br><br>(+ supplement recommended)                                |                                                                                                                                 | concentrations (UIC) ↑ post-fortification from 58 µg/L (IQR, 35–83 µg/L) to 101.0 µg/L (IQR, 66–163 µg/L, P<0.001). UIC for pregnant women (93 µg/L (IQR, 62–171 µg/L) lower than the recommended 150 µg/L                                                                | women in remote areas (n=14) was 64 µg/L (IQR, 41–89), < 50% target level. Urban Indigenous pregnant women (n=7): 122 µg/L (101–254); non-Indigenous (n=3): 165 µg/L (82–169) |
| <b>Reformulation- sodium reduction</b>                                                           |                                      |                    |          |          |                                                                             |                                                                                             |                                                                                                                                 |                                                                                                                                                                                                                                                                           |                                                                                                                                                                               |
| McMahon et al. 2017                                                                              | Quasi experimental<br><br>(moderate) | Australia (remote) | 18 weeks | Targeted | 26 Stores: intervention (n=15) control (n=11), mostly Aboriginal population | 25% salt reduction in top selling white bread (300 mg Na/100 g), in remote community stores | Community-based formative research taste-testing. Many stores owned and controlled by a committee of community representatives. | <i>Food purchasing:</i> Non-significant ↓ in sodium density of all purchases (–8 mg Na/MJ; 95% CI –18, 2; p = 0.14). Effect significant when one control store was dropped (–11 mg/MJ; 95% CI –22 to –1; p = 0.04). No significant effect on total sales or market share. | N/A                                                                                                                                                                           |
| <b><u>S</u> Set incentives and rules to create a healthy retail and food service environment</b> |                                      |                    |          |          |                                                                             |                                                                                             |                                                                                                                                 |                                                                                                                                                                                                                                                                           |                                                                                                                                                                               |

RCT= Randomised Controlled Trial; CI= Confidence Interval; SE= Standard Error; SD=Standard Deviation OR= Odds Ratio; RDI= Recommended Dietary Intake; BMI= Body Mass Index; zBMI=BMI z-score; SDS= Standard Deviation Score BP= Blood Pressure; BF= Body Fat; WC= Waist Circumference; SSB= sugar-sweetened beverages NTD= Neural Tube Defects

| Study                  | Study Design (quality)        | Location (rurality) | Duration     | Targeted / Universal | Participants**                                                                                            | Intervention                                                                                                                                                                              | Indigenous involvement?                                                                                                                                                                                    | Outcomes                                                                                                                                                                                    | Differential impact? |
|------------------------|-------------------------------|---------------------|--------------|----------------------|-----------------------------------------------------------------------------------------------------------|-------------------------------------------------------------------------------------------------------------------------------------------------------------------------------------------|------------------------------------------------------------------------------------------------------------------------------------------------------------------------------------------------------------|---------------------------------------------------------------------------------------------------------------------------------------------------------------------------------------------|----------------------|
| Bains et al. 2014      | Quasi-experimental (moderate) | Canada (remote)     | 13-16 months | targeted             | 136 Inuit and Inuvialuit women of child bearing age, mean age: 35 years (intervention n=79, control n=57) | <i>Heathy Foods North program:</i><br>Increased accessibility and availability and promotion of healthier foods in stores (including traditional foods), de-promotion of unhealthy foods. | Community consultations to develop intervention.<br><br>Community engagement approach throughout.<br><br>Training for, local community health representatives, project coordinators and local store staff. | <i>Diet:</i> Vitamin A intake ↑ by 558.23 µg/day more in intervention group. (95% CI 179.86, 936.59) a<br>Vitamin D intake ↑ by 89.23 IU/day more 95% CI= 3.86, 174.60).                    | . N/A                |
| Pakseresht et al. 2015 | Quasi-experimental (moderate) | Canada (remote)     | 12-14 months | targeted             | 263 Inuit and Inuvialuit adults, mean age: 45 years, 82% female (intervention n=172, control n=91)        | Promotional materials, taste-tests, shelf labels, educational activities in stores, + promotion via worksites, community-wide events, local media physical activity)                      | Community members hired and trained to deliver the intervention and collect data.                                                                                                                          | <i>Diet:</i> Intervention ↓ energy intake (β=-317kcal, 95% CI -570 to -64) ↑ vitamin A intake (β=232.38ug, 95% CI 104.04, 360.72) and ↑ vitamin D intake (β=53.46 IU, 95% CI 1.88, 108.80). |                      |
| Kolahdooz et al. 2014  | Quasi-experimental (moderate) | Canada (remote)     | 12 months    | targeted             | 332 Inuit and Inuvialuit adults, mean age: 44 years, 81% female (intervention n=221, control n= 111)      |                                                                                                                                                                                           | Presentation of results to stakeholders.                                                                                                                                                                   | <i>Diet:</i> ↓ high fat meats (-27.9 g/day), high fat dairy (-19.8 g/day) and SSB (-189 g/day) in intervention communities (all p ≤ 0.05).                                                  |                      |

RCT= Randomised Controlled Trial; CI= Confidence Interval; SE= Standard Error; SD=Standard Deviation OR= Odds Ratio; RDI= Recommended Dietary Intake; BMI= Body Mass Index; zBMI=BMI z-score; SDS= Standard Deviation Score BP= Blood Pressure; BF= Body Fat; WC= Waist Circumference; SSB= sugar-sweetened beverages NTD= Neural Tube Defects

|                                |                                      |                                  |                                                 |          |                                                                                                     |                                                                                                                                                                                 |                                                                                                                                                                                           |                                                                                                                                                                                                                                  |     |
|--------------------------------|--------------------------------------|----------------------------------|-------------------------------------------------|----------|-----------------------------------------------------------------------------------------------------|---------------------------------------------------------------------------------------------------------------------------------------------------------------------------------|-------------------------------------------------------------------------------------------------------------------------------------------------------------------------------------------|----------------------------------------------------------------------------------------------------------------------------------------------------------------------------------------------------------------------------------|-----|
| Mead et al. 2013               | Quasi-experimental<br><br>(moderate) | Canada (remote)                  | 12 months                                       | targeted | 379 Inuit and Inuvialuit adults, mean age: 42 years, 82% female (intervention n=246, control n=133) |                                                                                                                                                                                 |                                                                                                                                                                                           | <p><i>Diet:</i> Intervention not associated with significant changes in food acquisition. Significant ↓ unhealthy food acquisition among overweight participants.</p> <p><i>Anthropometry:</i> No significant impact on BMI.</p> |     |
| Blue Bird Jernigan et al. 2019 | RCT<br><br>(moderate)                | United States of America (rural) | 9 months in Nation A and 12 months in Nation B. | targeted | 1637 Native American adults, mean age: 42 years, 62% female (intervention n=825, control n=812)     | Increased accessibility and availability of healthier foods in tribally-owned convenience stores, in-store promotion of healthy foods and reduced-price combination meal deals. | Led by local Native American researcher, Steering committee overseeing study. Community focus groups guided intervention development; tribal health staff collected data with researchers | <p><i>Diet:</i> No difference in fruit and vegetable intake. Shopping frequency was significantly associated with purchases of fruit, veg and healthy items.</p>                                                                 | N/A |

RCT= Randomised Controlled Trial; CI= Confidence Interval; SE= Standard Error; SD=Standard Deviation OR= Odds Ratio; RDI= Recommended Dietary Intake; BMI= Body Mass Index; zBMI=BMI z-score; SDS= Standard Deviation Score BP= Blood Pressure; BF= Body Fat; WC= Waist Circumference; SSB= sugar-sweetened beverages NTD= Neural Tube Defects

|                        |                                  |                                  |                                             |          |                                                                                               |                                                                                                                                                                                                                              |                                                                                                                                                                 |                                                                                                                                                                                                                                                                                                                                                                                     |      |
|------------------------|----------------------------------|----------------------------------|---------------------------------------------|----------|-----------------------------------------------------------------------------------------------|------------------------------------------------------------------------------------------------------------------------------------------------------------------------------------------------------------------------------|-----------------------------------------------------------------------------------------------------------------------------------------------------------------|-------------------------------------------------------------------------------------------------------------------------------------------------------------------------------------------------------------------------------------------------------------------------------------------------------------------------------------------------------------------------------------|------|
| Gittlesohn et al. 2013 | RCT<br>(moderate)                | United States of America (rural) | 6 intervention phases, each phase 6-10weeks | targeted | 276 Native American adults, mean age: 46 years, 75% female, (intervention n=98, control n=47) | Increased availability of healthier foods in stores, promotion of healthy foods in stores (healthy cooking methods, taste-tests, promotional items, educational displays, shelf labels) Radio announcements of key messages. | Intervention developed following extensive formative research and community engagement workshops. Delivered by health workers fluent in both English and Navajo | <p><i>Anthropometry:</i> BMI trend toward impact (Intervention: -0.6 +/- 3.3, Control: +0.6 +/-3.1, P = 0.06). Intervention exposure associated with ↓ in BMI (Very low: -0.1 +/- 2.3; Very high: -1.8 +/- 3.8, P&lt;0.01). BMI continuous exposure score = -0.6 +/- 0.2, p&lt;0.1</p> <p><i>Diet:</i> intervention exposure assoc. with ↑ healthy food purchasing (p&lt;0.01).</p> | N/A  |
| Ho et al. 2008         | Quasi-experimental<br>(moderate) | Canada (remote)                  | 9 months                                    | targeted | 95 First Nations adults, mean age: 42 years, 77% female, (intervention n=57, control n=38)    | Increased availability and promotion of healthy food in stores (+ school curriculum + Schools encouraged to adopt healthy food policy + community awareness +physical activity)                                              | Formative research and collaboration with key stakeholders and community members. Community members collected data.                                             | <p><i>Diet:</i> ↑ healthy food acquisition in intervention communities (score 45.86 SD: 25.5) vs. controls (score: 33.92 SD: 19.3) (p = .003).</p> <p><i>Anthropometry:</i> No significant change in BMI</p>                                                                                                                                                                        | N/A? |

RCT= Randomised Controlled Trial; CI= Confidence Interval; SE= Standard Error; SD=Standard Deviation OR= Odds Ratio; RDI= Recommended Dietary Intake; BMI= Body Mass Index; zBMI=BMI z-score; SDS= Standard Deviation Score BP= Blood Pressure; BF= Body Fat; WC= Waist Circumference; SSB= sugar-sweetened beverages NTD= Neural Tube Defects

|                    |                                  |                    |         |          |                                                                                                      |                                                                                                                                                                                                                                                                                                             |                                                                                                                                 |                                                                                                                                                                                                                                                                                 |     |
|--------------------|----------------------------------|--------------------|---------|----------|------------------------------------------------------------------------------------------------------|-------------------------------------------------------------------------------------------------------------------------------------------------------------------------------------------------------------------------------------------------------------------------------------------------------------|---------------------------------------------------------------------------------------------------------------------------------|---------------------------------------------------------------------------------------------------------------------------------------------------------------------------------------------------------------------------------------------------------------------------------|-----|
| Rowley et al. 2000 | Quasi experimental<br>(moderate) | Australia (remote) | 4 years | targeted | Cross-sectional samples (n=200, 185 and 132) of Aboriginal people aged 15 years and over, 51% female | <i>Looma Healthy Lifestyle:</i><br><br>Community Council employed community member as store manager. Store policy to improve quality and quantity of fresh produce, store tours. (+ community health promotion, nutrition education, cooking classes, hunting trips +physical activity + smoking cessation) | Aboriginal community members initiated and ultimately directed the program<br>Aboriginal Health Workers employed to run program | <p><i>Biochemistry:</i><br/>Significantly ↓ fasting insulin (from 21 (95%CI 18-23) to 16 (95%CI 15-19) μU/mL) in people aged 35+</p> <p><i>Anthropometry:</i><br/>No change in overweight or obesity.</p> <p><i>Health outcome:</i><br/>no change in prevalence of diabetes</p> | N/A |
| Rowley et al. 2001 | Quasi-experimental<br>(moderate) |                    |         |          |                                                                                                      |                                                                                                                                                                                                                                                                                                             |                                                                                                                                 | <p><i>Biochemistry:</i><br/>Significantly ↓prevalence of high cholesterol (from 31%, to 15%; and ↑ plasma antioxidant concentrations (by approx. 20%).</p> <p><i>Diet:</i> Apparent intake of fruit and vegetable ↑ 6.8 g/MJ</p>                                                |     |

RCT= Randomised Controlled Trial; CI= Confidence Interval; SE= Standard Error; SD=Standard Deviation OR= Odds Ratio; RDI= Recommended Dietary Intake; BMI= Body Mass Index; zBMI=BMI z-score; SDS= Standard Deviation Score BP= Blood Pressure; BF= Body Fat; WC= Waist Circumference; SSB= sugar-sweetened beverages NTD= Neural Tube Defects

| Brimblecombe et al. 2019                                                                     | RCT<br>(high)                    | Australia<br>(remote)                    | 12-weeks implementation + 24-weeks post intervention | targeted             | 20 stores                                                                                        | Healthy retail environment to reduce merchandising of 4 food categories (sugar, SSB, sweet biscuits, and confectionery)                                                       | Collaboration with remote community store directors, co-designed with ALPA. Knowledge exchange with community leaders          | [under embargo until article published]                                                                                                                                                                                                                                                                                                                                   | N/A                  |
|----------------------------------------------------------------------------------------------|----------------------------------|------------------------------------------|------------------------------------------------------|----------------------|--------------------------------------------------------------------------------------------------|-------------------------------------------------------------------------------------------------------------------------------------------------------------------------------|--------------------------------------------------------------------------------------------------------------------------------|---------------------------------------------------------------------------------------------------------------------------------------------------------------------------------------------------------------------------------------------------------------------------------------------------------------------------------------------------------------------------|----------------------|
| <b>H Harness food supply chain and action across sectors to ensure coherence with health</b> |                                  |                                          |                                                      |                      |                                                                                                  |                                                                                                                                                                               |                                                                                                                                |                                                                                                                                                                                                                                                                                                                                                                           |                      |
| Study                                                                                        | Study Design (quality)           | Location (rurality)                      | Duration                                             | Targeted / Universal | Participants                                                                                     | Intervention                                                                                                                                                                  | Indigenous involvement?                                                                                                        | Outcomes                                                                                                                                                                                                                                                                                                                                                                  | Differential impact? |
| Bersamin et al. 2019                                                                         | Quasi-experimental<br>(moderate) | United States of America (rural, remote) | 9 months                                             | targeted             | 76 Alaska Native school children (intervention=38, control n=38), mean age 14 years, 55% female. | Fish-to-school program: local salmon caught by Native owned businesses served in the school lunches. (+ Classroom education, community events celebrating traditional foods). | Community working group co-designed activities with researchers that combined Yup'ik worldview with evidence-based strategies. | <i>Biochemistry:</i> rate of ↑ in nitrogen stable isotope (fish biomarker), 0.16 times greater in intervention group (Beta = 0.16; p < .05).<br><br><i>Diet:</i> ↑ odds of any fish servings (OR: 1.85 (95%CI: 1.00, 3.45), ↑ total fish servings (rate ratio: 2.22 95%CI 1.12, 4.35). ↑ in diet quality 4.57 times greater in intervention group (Beta = 4.57; p < .05). | N/A                  |

RCT= Randomised Controlled Trial; CI= Confidence Interval; SE= Standard Error; SD=Standard Deviation OR= Odds Ratio; RDI= Recommended Dietary Intake; BMI= Body Mass Index; zBMI=BMI z-score; SDS= Standard Deviation Score BP= Blood Pressure; BF= Body Fat; WC= Waist Circumference; SSB= sugar-sweetened beverages NTD= Neural Tube Defects

|                          |                                  |                       |           |          |                                                                               |                                                                                                                                                            |                                                                                                                                                                                     |                                                                                                                                                                                                                                                                                                                      |     |
|--------------------------|----------------------------------|-----------------------|-----------|----------|-------------------------------------------------------------------------------|------------------------------------------------------------------------------------------------------------------------------------------------------------|-------------------------------------------------------------------------------------------------------------------------------------------------------------------------------------|----------------------------------------------------------------------------------------------------------------------------------------------------------------------------------------------------------------------------------------------------------------------------------------------------------------------|-----|
| Brimblecombe et al. 2017 | Quasi-experimental<br>(moderate) | Australia<br>(remote) | 4 years   | targeted | Stakeholders in 4 Aboriginal communities, populations of 250-2000 people      | Multi-sectoral stakeholders (Good Food Groups) used continuous improvement approach to prioritise actions to achieve agreed goals in the local food system | Aboriginal project coordinator in each community; over half of people regularly participating in the Good Food Groups were Aboriginal, community feedback on data collection tools. | <i>Food Purchasing:</i> Marked downward trend in monthly confectionery sales and a slight upward trend for water sales in all communities. No clear impact on fruit and vegetable or soft drink sales (improvement in one community only).                                                                           | N/A |
| Butler et al. 2011       | Natural experiment<br>(moderate) | Australia<br>(remote) | 12 months | targeted | Remote Aboriginal community store serving a population of approx. 400 people. | Store Policy to remove the three highest selling SSB from the store.                                                                                       | Policy designed by Aboriginal leaders within Aboriginal owned and controlled organisation. Store monitoring and control by the Aboriginal Steering Committee                        | <i>Food purchasing:</i> Total SSB sales ↓ by 50% (23,153L) in one year. ↓ sugar sold from 6.47 to 4.36 tonnes. SSB sales (as % all beverage sales) ↓ from 48–51% to 23–30%; diet drinks ↑ from 15% to 20–22%; fruit juice, iced tea and flavoured still water ↑ from 12–14% to 21–29%; water ↑ from 16–18% to 20–23% |     |

RCT= Randomised Controlled Trial; CI= Confidence Interval; SE= Standard Error; SD=Standard Deviation OR= Odds Ratio; RDI= Recommended Dietary Intake; BMI= Body Mass Index; zBMI=BMI z-score; SDS= Standard Deviation Score BP= Blood Pressure; BF= Body Fat; WC= Waist Circumference; SSB= sugar-sweetened beverages NTD= Neural Tube Defects

|                     |                                  |                       |           |          |                                                                                                    |                                                                                                                                                                                                                     |                                                                                                                                                                                                      |                                                                                                                                                                                                                                         |
|---------------------|----------------------------------|-----------------------|-----------|----------|----------------------------------------------------------------------------------------------------|---------------------------------------------------------------------------------------------------------------------------------------------------------------------------------------------------------------------|------------------------------------------------------------------------------------------------------------------------------------------------------------------------------------------------------|-----------------------------------------------------------------------------------------------------------------------------------------------------------------------------------------------------------------------------------------|
| Cueva et al. 2018   | Quasi-experimental<br>(low)      | United States (rural) | 3 months  | targeted | 101 Native American adults, 53% aged 25-54 years, 78% female.                                      | Mobile grocery store transported healthy foods to the community. centre twice a week; health promotion activities in conjunction visits, e.g. cooking classes, samples, recipes, farmers workshops farmers markets) | Guided by the Community Advisory Boards-provided oversight and direction for the project, and community members developed and facilitated activities. Community member + researcher conducted survey | <p><i>Food Security:</i> ↑ fruit availability in homes from 66% to 80%. (p = .026). Non-significant ↓ Food insecurity from 57% to 43% (p = .147).</p> <p><i>Unintended:</i> ↑ snack food availability from 22% to 48% (p &lt; .001)</p> |
| Fehring et al. 2019 | Quasi-experimental<br>(moderate) | Australia (remote)    | 12 months | targeted | Community populations ranging from 300 to 1,400 people 85-95% Aboriginal or Torres Strait Islander | Multisectoral committees led environmental actions to ↑ water and ↓ SSB. E.g. water bubblers, drink fridges in stores promoting water; policies governing drink availability.<br><br>(Plus social marketing)        | Aboriginal health organisation staff worked with Aboriginal Shire Councils, community leaders, organisations and community members to co-design and implement local actions, Indigenous author.      | <p><i>Food purchasing:</i> ↑ Water sales as % total drink volume by 3.1% (p&lt;0.001) and ↓ SSB sales as % total drink volume by 3.4% (p&lt;0.001) compared to the control store.</p>                                                   |

RCT= Randomised Controlled Trial; CI= Confidence Interval; SE= Standard Error; SD=Standard Deviation OR= Odds Ratio; RDI= Recommended Dietary Intake; BMI= Body Mass Index; zBMI=BMI z-score; SDS= Standard Deviation Score BP= Blood Pressure; BF= Body Fat; WC= Waist Circumference; SSB= sugar-sweetened beverages NTD= Neural Tube Defects



| Tyrell et al. 2003                                                       | Natural experiment<br>(low) | Australia (remote)       | 2 year    | targeted             | Aboriginal community population: 300 people                                     | Intersectoral and intra-sectoral collaboration to improve community nutrition e.g. vegetable garden school activities, store activities women's centre, community-based workers, ↑ healthy food choices in the store, ↑ health professional visits | Community members initiated the project, directed by steering committee comprising senior community members. Community based workers on the project team.   | <i>Food Purchasing:</i><br>65% ↓ in sugar<br>175% ↑ low-fat tinned meat and vegetable meals,<br>81% ↑ fruit and<br>11% ↑ vegetable purchasing from the store.                                  |                                                                                                                         |
|--------------------------------------------------------------------------|-----------------------------|--------------------------|-----------|----------------------|---------------------------------------------------------------------------------|----------------------------------------------------------------------------------------------------------------------------------------------------------------------------------------------------------------------------------------------------|-------------------------------------------------------------------------------------------------------------------------------------------------------------|------------------------------------------------------------------------------------------------------------------------------------------------------------------------------------------------|-------------------------------------------------------------------------------------------------------------------------|
| <b>I Inform people about food and nutrition through public awareness</b> |                             |                          |           |                      |                                                                                 |                                                                                                                                                                                                                                                    |                                                                                                                                                             |                                                                                                                                                                                                |                                                                                                                         |
| Study                                                                    | Study Design (quality)      | Location (rurality)      | Duration  | Targeted / Universal | Participants                                                                    | Intervention                                                                                                                                                                                                                                       | Indigenous involvement?                                                                                                                                     | Outcomes                                                                                                                                                                                       | Differential impact?                                                                                                    |
| Browne et al. 2019                                                       | Cross-sectional<br>(low)    | Australia (urban, rural) | 12 months | universal & Targeted | 150 Aboriginal or Torres Strait Islander adults, mostly 18-49 years, 76% female | Universal and Aboriginal-specific campaign to ↓ sugary drink consumption aired on television.                                                                                                                                                      | Led by Aboriginal health organisation. Team included experienced Aboriginal health practitioner. Campaign developed in consultation with Aboriginal people. | <i>Diet:</i> 60% who had seen the targeted campaign reported ↓ SSB vs. 48% of those who had not seen the it but had seen the universal campaign. Difference was not statistically significant. | No difference in reported ↓ sugary drink consumption between participants who had seen the universal campaign and those |

RCT= Randomised Controlled Trial; CI= Confidence Interval; SE= Standard Error; SD=Standard Deviation OR= Odds Ratio; RDI= Recommended Dietary Intake; BMI= Body Mass Index; zBMI=BMI z-score; SDS= Standard Deviation Score BP= Blood Pressure; BF= Body Fat; WC= Waist Circumference; SSB= sugar-sweetened beverages NTD= Neural Tube Defects

|                     |                               |                     |         |          |                                                                                                                        |                                                                                                                                                                                                                                                                                            |                                                                                                                                                    |                                                                                                                                                                                                                                                                                                                                                                                                               |                                     |
|---------------------|-------------------------------|---------------------|---------|----------|------------------------------------------------------------------------------------------------------------------------|--------------------------------------------------------------------------------------------------------------------------------------------------------------------------------------------------------------------------------------------------------------------------------------------|----------------------------------------------------------------------------------------------------------------------------------------------------|---------------------------------------------------------------------------------------------------------------------------------------------------------------------------------------------------------------------------------------------------------------------------------------------------------------------------------------------------------------------------------------------------------------|-------------------------------------|
|                     |                               |                     |         |          |                                                                                                                        |                                                                                                                                                                                                                                                                                            |                                                                                                                                                    |                                                                                                                                                                                                                                                                                                                                                                                                               | who had not (56% vs 52%, P > 0.05). |
| Coppell et al. 2009 | Quasi-experimental (moderate) | New Zealand (rural) | 2 years | targeted | 286 Māori adults, mean ages 39 and 63 years, 59% female.<br><br>Most changes were among 25–49 years old women (n=102): | Community-led healthy lifestyle intervention: local media and role models, community education, cooking skills, label reading, recipes, weight-ins) and a structural strategy. (Local organisations encouraged to make structural/ policy change + physical activity + smoking cessation). | Community development approach. Involvement of community members in every step, from planning, development and implementation of the intervention. | <p><i>Health outcome:</i><br/>↓ prevalence of insulin resistance (38.2–25.6%) and diabetes (6.9%–1.3%) but ↑ pre-diabetes i (2.9%–12.8%) (p = 0.015).</p> <p><i>Diet:</i> ↑ % of women 25–49 years eating wholemeal/ wholegrain bread from 42.2% to 65.4% ( p = 0.044),</p> <p><i>Anthropometry:</i> non-significant ↓ WC, weight and BMI (from 33.6, SD: 8.6, to 32.1, SD: 7.3) among women 25-49 years.</p> | N/A                                 |

RCT= Randomised Controlled Trial; CI= Confidence Interval; SE= Standard Error; SD=Standard Deviation OR= Odds Ratio; RDI= Recommended Dietary Intake; BMI= Body Mass Index; zBMI=BMI z-score; SDS= Standard Deviation Score BP= Blood Pressure; BF= Body Fat; WC= Waist Circumference; SSB= sugar-sweetened beverages NTD= Neural Tube Defects

|                     |                                  |                                  |         |          |                                                                                                                                                       |                                                                                                                                                                                                                                                                                                                                                |                                                                                                               |                                                                                                                                                                                                                                                                                                                            |  |
|---------------------|----------------------------------|----------------------------------|---------|----------|-------------------------------------------------------------------------------------------------------------------------------------------------------|------------------------------------------------------------------------------------------------------------------------------------------------------------------------------------------------------------------------------------------------------------------------------------------------------------------------------------------------|---------------------------------------------------------------------------------------------------------------|----------------------------------------------------------------------------------------------------------------------------------------------------------------------------------------------------------------------------------------------------------------------------------------------------------------------------|--|
| Karanja et al. 2010 | Quasi-experimental<br>(moderate) | United States of America (rural) | 2 years | targeted | 410 Native American/ Alaska Native mothers or guardians of infants 0-24 months, mean age: 25 years pre-test sample: n= 205, post-test sample n= 205). | Community-wide health promotion to raise awareness about breastfeeding and reducing SSB (local media posters, health education for mothers, breastfeeding rooms, water availability etc.)<br><br>+/- individual counselling with Community Health Workers to support breastfeeding along with water and sugar-sweetened beverage interventions | Interventions informed by focus groups. Community Health Workers and cultural leaders delivered interventions | <i>Breastfeeding:</i><br>initiation 14% higher and 6-month rates 15% higher than national data. 12 month rates comparable to national data (both 17%).<br><br><i>Anthropometry:</i><br>BMI-Z scores ↑ but ↑ was less in groups receiving individual counselling (zBMI ↓ by 0.75, P = 0.016) but still > comparison sample. |  |
| Maupome et al. 2010 | Quasi-experimental<br>(moderate) | United States of America (rural) | 2 years | targeted | 178 Native American/ Alaska Native infants aged 18-30 months, 46% female.                                                                             |                                                                                                                                                                                                                                                                                                                                                |                                                                                                               | <i>Health outcome:</i><br>Significant ↓ trends in dental caries. Dt1 caries ↓ between 0.300 (SD: 0.140, p= 0.032) and 0.631 (SD:0.157, p= 0.000)                                                                                                                                                                           |  |

RCT= Randomised Controlled Trial; CI= Confidence Interval; SE= Standard Error; SD=Standard Deviation OR= Odds Ratio; RDI= Recommended Dietary Intake; BMI= Body Mass Index; zBMI=BMI z-score; SDS= Standard Deviation Score BP= Blood Pressure; BF= Body Fat; WC= Waist Circumference; SSB= sugar-sweetened beverages NTD= Neural Tube Defects

| <b>N Nutrition advice and counselling in health care settings</b> |                               |                            |                     |                             |                                                                                 |                                                                                                                                                                             |                                                                                                                                                                       |                                                                                                                                                                                                                                                                    |                             |
|-------------------------------------------------------------------|-------------------------------|----------------------------|---------------------|-----------------------------|---------------------------------------------------------------------------------|-----------------------------------------------------------------------------------------------------------------------------------------------------------------------------|-----------------------------------------------------------------------------------------------------------------------------------------------------------------------|--------------------------------------------------------------------------------------------------------------------------------------------------------------------------------------------------------------------------------------------------------------------|-----------------------------|
| <b>Study</b>                                                      | <b>Study Design (quality)</b> | <b>Location (rurality)</b> | <b>Duration</b>     | <b>Targeted / Universal</b> | <b>Participants**</b>                                                           | <b>Intervention</b>                                                                                                                                                         | <b>Indigenous involvement?</b>                                                                                                                                        | <b>Outcomes</b>                                                                                                                                                                                                                                                    | <b>Differential impact?</b> |
| Martens 2002                                                      | Quasi-experimental (moderate) | Canada (rural)             | Prenatal - 3 months | Targeted                    | 283 First Nations women                                                         | Prenatal breastfeeding education delivered by nurse. Postpartum peer counsellor program once every 2 weeks for months 2 and 3. (+ other prenatal care issues)               | Indigenous peer counsellors hired at the health centre and trained in communication skills and basic breastfeeding knowledge.                                         | <i>Breastfeeding</i> : ↑ breast feeding initiation (1.5 times higher than previous 5 years). Clients half as likely as non-clients, to wean (adjusted OR = 0.50, 95% CI 0.25-0.98, P < .02).<br>↑breastfeeding at 2 months (61% vs. 48%) and 6 months (56% vs 19%) | N/A                         |
| Gray-Donald et al. 2000                                           | Quasi-experimental (moderate) | Canada (remote)            | 9 months            | Targeted                    | 219 First Nations women, mean age 24 years (intervention n=112, control, n=107) | Individual diet counselling, (mean 4/person) related to healthy eating and staying within guidelines for weight gain during pregnancy; (+ Local media, + physical activity) | Research proposal developed at the request of, and in close collaboration with First National Health organisation. Indigenous health workers hired in each community. | <i>Anthropometry</i> : No difference in weight gain between groups.<br><i>Diet</i> : No change in energy/nutrient intake<br><i>Breastfeeding</i> at 6 weeks: 87% in the intervention group vs. 83% control group.                                                  | N/A                         |

RCT= Randomised Controlled Trial; CI= Confidence Interval; SE= Standard Error; SD=Standard Deviation OR= Odds Ratio; RDI= Recommended Dietary Intake; BMI= Body Mass Index; zBMI=BMI z-score; SDS= Standard Deviation Score BP= Blood Pressure; BF= Body Fat; WC= Waist Circumference; SSB= sugar-sweetened beverages NTD= Neural Tube Defects

|                        |                                   |                   |                                |           |                                 |                                                                                                                                                                                                                                           |                                                                 |                                                                                                                                                                                                                                                                                                                                                                                                                                                                                                                           |                                                                                                                                                                                                                                                                                                                                                                  |
|------------------------|-----------------------------------|-------------------|--------------------------------|-----------|---------------------------------|-------------------------------------------------------------------------------------------------------------------------------------------------------------------------------------------------------------------------------------------|-----------------------------------------------------------------|---------------------------------------------------------------------------------------------------------------------------------------------------------------------------------------------------------------------------------------------------------------------------------------------------------------------------------------------------------------------------------------------------------------------------------------------------------------------------------------------------------------------------|------------------------------------------------------------------------------------------------------------------------------------------------------------------------------------------------------------------------------------------------------------------------------------------------------------------------------------------------------------------|
| Muhajarine et al. 2012 | Cross-sectional survey (moderate) | Canada (National) | 9 months? (pre/postnatal data) | Universal | 48,184 women, 23% First Nations | Canada Prenatal Nutrition Program, individual nutrition education, group nutrition counselling or lifestyle education, food/milk supplements<br><br>(Also, community-based projects across Canada, parenting support, housing assistance) | Program included partnerships with First Nations organisations. | <p><i>Breastfeeding:</i> High program exposure ↑ breastfeeding initiation (OR 1.27, 95%CI: 1.11-1.46) and duration (OR 2.97, 95%CI: 1.01-8.76).</p> <p><i>Health outcome:</i> 28% ↓ risk preterm birth (OR 0.72 CI: 0.57-0.92); a 35% ↓ low birth weight (0.65 95%CI: 0.53-0.81) and 13% ↓ poor neonatal health (OR: 0.87 95%CI 0.77-0.98)</p> <p><i>Unintended:</i> High program exposure ↑ excess weight gain for both Aboriginal (OR: 1.09 95%CI: 1.01-1.17) and non-Aboriginal women (OR: 1.16, 95%CI: 1.01-1.33)</p> | <p>For non-Aboriginal women, high exposure not associated with initiation but was with duration (OR 4.79, 95%CI: 2.90-7.89).</p> <p>ORs similar for non-Aboriginal women but only non-Aboriginal women had ↓ risk (9%) of having an SGA infant.</p> <p><i>Unintended:</i> ↑ risk of having an LGA infant for Aboriginal women only (OR 1.27 95%CI 1.08-1.50)</p> |
|------------------------|-----------------------------------|-------------------|--------------------------------|-----------|---------------------------------|-------------------------------------------------------------------------------------------------------------------------------------------------------------------------------------------------------------------------------------------|-----------------------------------------------------------------|---------------------------------------------------------------------------------------------------------------------------------------------------------------------------------------------------------------------------------------------------------------------------------------------------------------------------------------------------------------------------------------------------------------------------------------------------------------------------------------------------------------------------|------------------------------------------------------------------------------------------------------------------------------------------------------------------------------------------------------------------------------------------------------------------------------------------------------------------------------------------------------------------|

RCT= Randomised Controlled Trial; CI= Confidence Interval; SE= Standard Error; SD=Standard Deviation OR= Odds Ratio; RDI= Recommended Dietary Intake; BMI= Body Mass Index; zBMI=BMI z-score; SDS= Standard Deviation Score BP= Blood Pressure; BF= Body Fat; WC= Waist Circumference; SSB= sugar-sweetened beverages NTD= Neural Tube Defects

|                   |                          |                                              |               |                      |                                                                                                                                                             |                                                                                                                                  |                                                                                                                                                                                                 |                                                                                                                                                                                                                                                                                                                                                                                                                                                                                                                                       |                                                                                                                                                                                                                                                                                                                                                                                                                                |
|-------------------|--------------------------|----------------------------------------------|---------------|----------------------|-------------------------------------------------------------------------------------------------------------------------------------------------------------|----------------------------------------------------------------------------------------------------------------------------------|-------------------------------------------------------------------------------------------------------------------------------------------------------------------------------------------------|---------------------------------------------------------------------------------------------------------------------------------------------------------------------------------------------------------------------------------------------------------------------------------------------------------------------------------------------------------------------------------------------------------------------------------------------------------------------------------------------------------------------------------------|--------------------------------------------------------------------------------------------------------------------------------------------------------------------------------------------------------------------------------------------------------------------------------------------------------------------------------------------------------------------------------------------------------------------------------|
| Quinn et al. 2017 | Quasi-experimental (low) | Australia (state-wide: urban, rural, remote) | 3 or 6 months | Universal + targeted | 34,211, 4.5% Aboriginal. Universal program: mean age 49 years, Targeted program: 70% aged 18–49 years and more likely to be from low income or remote area) | Telephone information and coaching about lifestyle change. Universal and culturally tailored program (+physical activity advice) | Formative research to tailor program. Peak Aboriginal health organisation funded to facilitate promotion of targeted program Aboriginal community health professionals were source of referral. | <p><i>Anthropometry:</i><br/>On average Aboriginal participants ↓ 2.1kg [SD: 6.3] after 3 months and ↓ 3.33kg [SD 9.4] after 6 months; ↓ WC of 3.4 cm [SD 5.8] after 3 months ↓ 6.2cm after 6 months; ↓ BMI of 0.8 [SD 2.4] at 3 months and 1.2 [SD 3.7] after 6months</p> <p><i>Diet:</i> ↑ fruit intake by 0.5 (SD 1.0) serves ↑ veg by 0.8 (SD 1.4) serves/day at 3 and 6 months, ↓ take away by 0.3 serves/week [SD 1.2] after both 3 and 6 months. (All p&lt;0.0001). SSB ↓ 0.3 [SD1.4] serves/day after 3 months (p=0.002).</p> | <p>No differences between the improvements [between baseline and 6-months] for Aboriginal and non-Aboriginal participants.</p> <p>No significant differences in Aboriginal participants' improvement based on program completed</p> <p>i.e. targeted (mean ↓ weight -2.7kg (SD 8.6), -BMI 1.1 (SD 3.1), waist ↓ -5.0 (SD 8.1) vs. universal program (mean ↓ weight -4.7kg (SD 6.1), BMI -1.7 (SD 2.3), waist -6.9 (SD 7.6)</p> |
|-------------------|--------------------------|----------------------------------------------|---------------|----------------------|-------------------------------------------------------------------------------------------------------------------------------------------------------------|----------------------------------------------------------------------------------------------------------------------------------|-------------------------------------------------------------------------------------------------------------------------------------------------------------------------------------------------|---------------------------------------------------------------------------------------------------------------------------------------------------------------------------------------------------------------------------------------------------------------------------------------------------------------------------------------------------------------------------------------------------------------------------------------------------------------------------------------------------------------------------------------|--------------------------------------------------------------------------------------------------------------------------------------------------------------------------------------------------------------------------------------------------------------------------------------------------------------------------------------------------------------------------------------------------------------------------------|

RCT= Randomised Controlled Trial; CI= Confidence Interval; SE= Standard Error; SD=Standard Deviation OR= Odds Ratio; RDI= Recommended Dietary Intake; BMI= Body Mass Index; zBMI=BMI z-score; SDS= Standard Deviation Score BP= Blood Pressure; BF= Body Fat; WC= Waist Circumference; SSB= sugar-sweetened beverages NTD= Neural Tube Defects

| <b>G Give nutrition education and skills</b> |                          |                                  |           |                      |                                                                                                                 |                                                                                                                                   |                                                                    |                                                                                                                                                                                            |                                                                                                                                                       |
|----------------------------------------------|--------------------------|----------------------------------|-----------|----------------------|-----------------------------------------------------------------------------------------------------------------|-----------------------------------------------------------------------------------------------------------------------------------|--------------------------------------------------------------------|--------------------------------------------------------------------------------------------------------------------------------------------------------------------------------------------|-------------------------------------------------------------------------------------------------------------------------------------------------------|
| Study                                        | Study Design (quality)   | Location (rurality)              | Duration  | Targeted / Universal | Participants**                                                                                                  | Intervention                                                                                                                      | Indigenous involvement?                                            | Outcomes                                                                                                                                                                                   | Differential impact?                                                                                                                                  |
| Frenn et al. 2010                            | Quasi-experimental (low) | United States of America (urban) | 12 months | Universal            | 130 middle school students, 3% Native American, aged 12-15 years, 52% female. (intervention n=67, control n=64) | School curriculum: four-session (Internet and video) intervention with healthy snack provided (+ physical activity at one school) | None given                                                         | <i>Diet:</i> No difference in % fat between the intervention and control groups overall                                                                                                    | Girls in the intervention group ↓ dietary fat by 0.5% v's. 2% ↑ for controls (p = .018) for African Americans, White, Hispanics, and Native Americans |
| Govula et al. 2007                           | Quasi-experimental (low) | United States of America (rural) | 6 weeks   | Targeted             | 33 Native American school children aged 8-11 years, 46% female, (intervention n=12, control n=21)               | Culturally-adapted nutrition education, delivered in the classroom. 6 x 30 minute lessons                                         | Lessons developed by investigators with input from tribal members. | <i>Diet:</i> ↑ fruit and vegetable intake (change between groups: 2.7 ± 1.0 serving per day, P ≤ .0001) ↑ vegetables (2.2 ± 0.3 serving per day, P ≤ .0001) non-significant ↑ fruit intake | N/A                                                                                                                                                   |

RCT= Randomised Controlled Trial; CI= Confidence Interval; SE= Standard Error; SD=Standard Deviation OR= Odds Ratio; RDI= Recommended Dietary Intake; BMI= Body Mass Index; zBMI=BMI z-score; SDS= Standard Deviation Score BP= Blood Pressure; BF= Body Fat; WC= Waist Circumference; SSB= sugar-sweetened beverages NTD= Neural Tube Defects

|                     |                             |                   |                                |          |                                                                                                        |                                                                                                                                                                                                                          |                                                                                                                                  |                                                                                                                                                                                                                                              |      |
|---------------------|-----------------------------|-------------------|--------------------------------|----------|--------------------------------------------------------------------------------------------------------|--------------------------------------------------------------------------------------------------------------------------------------------------------------------------------------------------------------------------|----------------------------------------------------------------------------------------------------------------------------------|----------------------------------------------------------------------------------------------------------------------------------------------------------------------------------------------------------------------------------------------|------|
| Jimenez et al. 2003 | Quasi-experimental<br>(low) | Canada (rural)    | 4 years                        | Targeted | 156 (baseline)<br>146 (follow up)<br>First Nations school children                                     | Curriculum for children in grades 1 -6, included nutrition, fitness, diabetes and healthy lifestyles in 10 x 45 min lessons/year /grade.<br><br>(Also, local media, physical activity)                                   | Program initiated following community requests<br><br>Community Advisory Board                                                   | <i>Diet:</i> ↓ frequency high-fat foods from 90.4% to 82.2% (P<0.05)<br><br><i>Unintended</i> ↓fruit (4.4+/-4.1 kcal/day to 2.9 +/-1.8 kcal/day) (P<0.001), ↑ in energy from sugar (from 96.2 +/-99.8 kcal/d to 146 +/-174.9kcal/d, P<0.05)  | N/A  |
| Malseed et al. 2014 | Quasi-experimental<br>(low) | Australia (urban) | 1 x 90min session on nutrition | Targeted | 81 high school students, 89% Aboriginal or Torres Strait Islander, mean age: 14.8 years, 67.7% female. | School-based education program using positive role models. 90 min session delivered once/week over 7-weeks<br>Covered 7: modules including nutrition (also chronic disease, physical activity, smoking, drugs & alcohol) | Program developed in partnership Indigenous healthy life- style officers. Young Indigenous role models facilitated all sessions. | <i>Diet:</i> Significant difference of 1.5 days/week (95% CI 0.05-2.98) in breakfast frequency between the control and intervention group (P = 0.042). Differences between groups in fruit and veg, takeaway and soft-drink not significant. | None |

RCT= Randomised Controlled Trial; CI= Confidence Interval; SE= Standard Error; SD=Standard Deviation OR= Odds Ratio; RDI= Recommended Dietary Intake; BMI= Body Mass Index; zBMI=BMI z-score; SDS= Standard Deviation Score BP= Blood Pressure; BF= Body Fat; WC= Waist Circumference; SSB= sugar-sweetened beverages NTD= Neural Tube Defects



|                       |                                |                             |              |           |                                                                                                         |                                                                                                                                                                                                                |                                                                                                                                   |                                                                                                                                                                                                                                                                                                                  |                                                                                                                                                                                      |
|-----------------------|--------------------------------|-----------------------------|--------------|-----------|---------------------------------------------------------------------------------------------------------|----------------------------------------------------------------------------------------------------------------------------------------------------------------------------------------------------------------|-----------------------------------------------------------------------------------------------------------------------------------|------------------------------------------------------------------------------------------------------------------------------------------------------------------------------------------------------------------------------------------------------------------------------------------------------------------|--------------------------------------------------------------------------------------------------------------------------------------------------------------------------------------|
| Pettigrew et al. 2015 | quasi-experimental<br>(low)    | Australia<br>(urban, rural) | 2-8 sessions | universal | 875 adults, 19% Aboriginal, 41.1% Aboriginal participants <29 years, 76% female                         | Education program 2-8 sessions covering a range of nutrition topics, label reading, budgeting etc.                                                                                                             | None given                                                                                                                        | <i>Diet:</i> For Aboriginal participants, mean fruit intake ↑ by 0.60 (SD 1.08) serves/d and veg intake ↑ by 1.14 (SD 1.81) serves/d (both p<0.001) Junk food consumption ↓ by -0.54 (SD 1.57) days/week (p<0.001)                                                                                               | For non-Aboriginal participants, no change in fruit intake. Mean veg intake ↑ by 0.36 (SD 1.54) serves/day. Junk food ↓ by -0.11 (SD 0.95) days/week from 0.83 to 0.73 d/w (p<0.005) |
| Ronsley et al. 2013   | Quasi-experimental<br>(medium) | Canada<br>(remote)          | 10 months    | Targeted  | 179 First Nations school students, mean age: 10.9 years, 48% female (intervention n=118, control n= 61) | 21 lesson curriculum (tailored from universal program). Older students teach the younger students the lesson. Includes lessons about healthy and unhealthy foods and drinks (+ physical activity, self-esteem) | Before implementation, each community had the opportunity to review the original program. Focus groups to help tailor the program | <i>Anthropometry:</i> ↓ zBMI (1.10 to 1.04, p = .028) ↓ WC (77.1 to 75.0 cm, p < .0001) in Intervention group vs. ↑ in zBMI (1.14 to 1.23, p = .046) in the control group. % with “normal” zBMI ↑ by 11% in one school, and obesity ↓ by 11% in the other. In the control group, the % of “normal” zBMI ↓ by 11% | N/A                                                                                                                                                                                  |

RCT= Randomised Controlled Trial; CI= Confidence Interval; SE= Standard Error; SD=Standard Deviation OR= Odds Ratio; RDI= Recommended Dietary Intake; BMI= Body Mass Index; zBMI=BMI z-score; SDS= Standard Deviation Score BP= Blood Pressure; BF= Body Fat; WC= Waist Circumference; SSB= sugar-sweetened beverages NTD= Neural Tube Defects

|                    |                             |                              |                              |           |                                                                                                           |                                                                                                                                                                                |                                                                                                                               |                                                                                                                                                                                                                                                                                       |                                                                                                                                     |
|--------------------|-----------------------------|------------------------------|------------------------------|-----------|-----------------------------------------------------------------------------------------------------------|--------------------------------------------------------------------------------------------------------------------------------------------------------------------------------|-------------------------------------------------------------------------------------------------------------------------------|---------------------------------------------------------------------------------------------------------------------------------------------------------------------------------------------------------------------------------------------------------------------------------------|-------------------------------------------------------------------------------------------------------------------------------------|
| Santos et al. 2014 | RCT<br>(high)               | Canada<br>(urban,<br>rural)  | 1 school year<br>(10 months) | Universal | 647 school students, 15% First Nations, mean age 9.3 years, 51% female, (intervention=340, control n=307) | Older students received 45-minute healthy living lesson then taught 30-minute lesson to their younger "buddies."                                                               | Included First Nations peer mentors                                                                                           | <i>Anthropometry:</i> ↓ WC in intervention group (−2.00 [95% CI, −2.48 to −1.51] vs. control group −0.40 [−0.89 to 0.09] cm; p < .001). No difference in changes in zBMI between groups.                                                                                              | ↓ WC nearly double in First Nations vs. with non-First Nations children (−2.5 cm [95% CI, −4.2 to −0.8] vs. −1.3 cm [−2.0 to −0.6]) |
| Tomlin et al. 2012 | Quasi-experimental<br>(low) | Canada<br>(rural,<br>remote) |                              | Targeted  | 134 First Nations school students, mean age 13 years, 48% female                                          | Classroom-based nutrition education at least once/month, fruit and vegetable taste tests and a sugar-sweetened beverage campaign in classroom or school. (+ physical activity) | Initiated in response to an invitation from 3 First Nations communities based on concerns about diabetes in their communities | <i>Anthropometry</i> No change in zBMI pre: 1.12; post: 1.10; p=0.288); zWC ↑ from 0.46 (SE1.07) to 0.57 (SD1.04) (p=0.023).<br><i>Diet:</i> ↑ in the variety of vegetables consumed (1.10 +/- 1.18 to 1.45 +/- 1.24; p<0.05); Energy, fruit, veg, sugary drink intake did not change | N/A                                                                                                                                 |

\* Articles published from the same study have some cells merged to reduce repetition

\*\* We have used country-specific terms for Indigenous peoples e.g. Aboriginal (Australia), Māori (New Zealand), First Nations, Inuit, Inuvialuit (Canada), Native American, Alaska Native (United States of America)

RCT= Randomised Controlled Trial; CI= Confidence Interval; SE= Standard Error; SD=Standard Deviation OR= Odds Ratio; RDI= Recommended Dietary Intake; BMI= Body Mass Index; zBMI=BMI z-score; SDS= Standard Deviation Score BP= Blood Pressure; BF= Body Fat; WC= Waist Circumference; SSB= sugar-sweetened beverages NTD= Neural Tube Defects
